# Supplementary material for: Characterization of genome-wide segmental duplications reveals a common genomic feature of association with immunity among domestic animals
Source: PubMed Central journal article supplement (PMC5389087; doi:10.1186/s12864-017-3690-x), 2017-04-12

## Supplemental Figure

### Figure S1. SD maps of domestic species

Figure S1.1 SD maps of bovine genome

Figure S1.2 SD maps of porcine genome

Figure S1.3 SD maps of equine genome

Figure S1.4 SD maps of rabbit genome

Figure S1.5 SD maps of caprine genome

Figure S1.6 SD maps of ovine genome

Figure S1.7 SD maps of chicken genome

Only SDs with length  $\geq 5$  kb are exhibited. Intrachromosomal pairwise alignments are collected by blue line, and the interchromosomals are marked with short red lines. The map was drawn using the program parasight v7.6

(<http://eichlerlab.gs.washington.edu/jeff/parasight/index.html>).

### Figure S2. Total length of SD regions on each chromosome of 7 domestic species

Figure S2.1 Total length of SD regions on each chromosome of bovine genome

Figure S2.2 Total length of SD regions on each chromosome of porcine genome

Figure S2.3 Total length of SD regions on each chromosome of equine genome

Figure S2.4 Total length of SD regions on each chromosome of rabbit genome

Figure S2.5 Total length of SD regions on each chromosome of caprine genome

Figure S2.6 Total length of SD regions on each chromosome of ovine genome

Figure S2.7 Total length of SD regions on each chromosome of chicken genome

Chromosome with high content of SDs is marked with red. For better comparison of SD content between different species, we use the uniform coordinate axis among 7 species.

### Figure S3. Distribution of SDs (length $\geq 5$ kb) among 7 domestic species

Figure S3.1 Distribution of SDs (length  $\geq 5$  kb) of bovine genome

Figure S3.2 Distribution of SDs (length  $\geq 5$  kb) of porcine genome

Figure S3.3 Distribution of SDs (length  $\geq 5$  kb) of equine genome

Figure S3.4 Distribution of SDs (length  $\geq 5$  kb) of rabbit genome

Figure S3.5 Distribution of SDs (length  $\geq 5$  kb) of caprine genome

Figure S3.6 Distribution of SDs (length  $\geq 5$  kb) of ovine genome

Figure S3.7 Distribution of SDs (length  $\geq 5$  kb) of chicken genome

Only SDs with length  $\geq 5$  kb are exhibited. Pairwise alignments with identity  $< 94\%$  are drawn in red lines, and pairwise alignments with identity  $\geq 94\%$  are marked in blue lines. The result was drawn using the program Circos (<http://circos.ca/>)

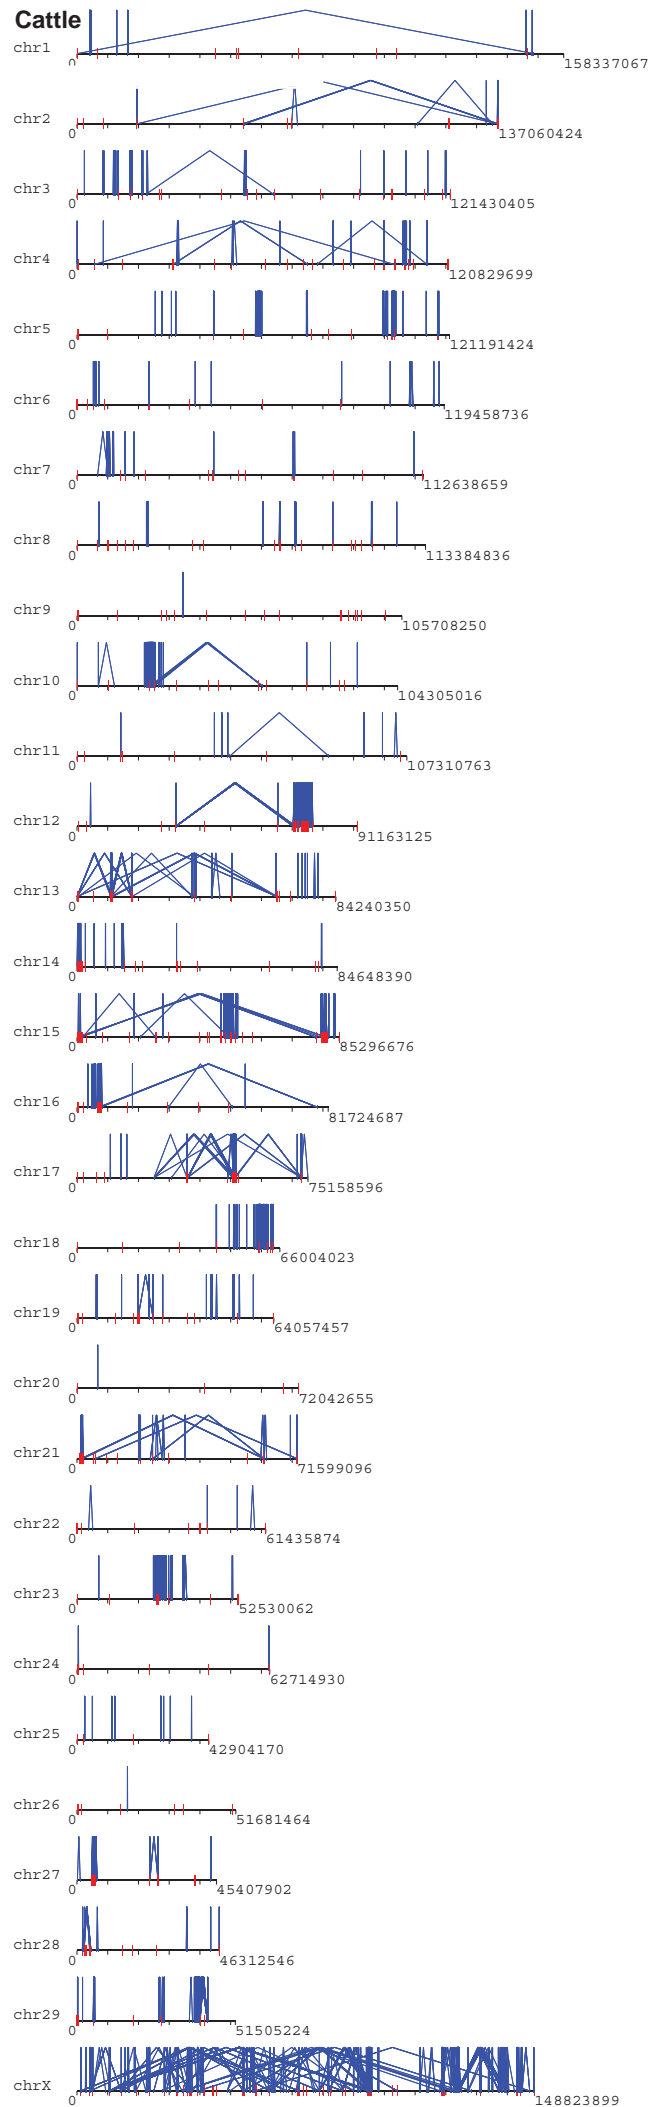

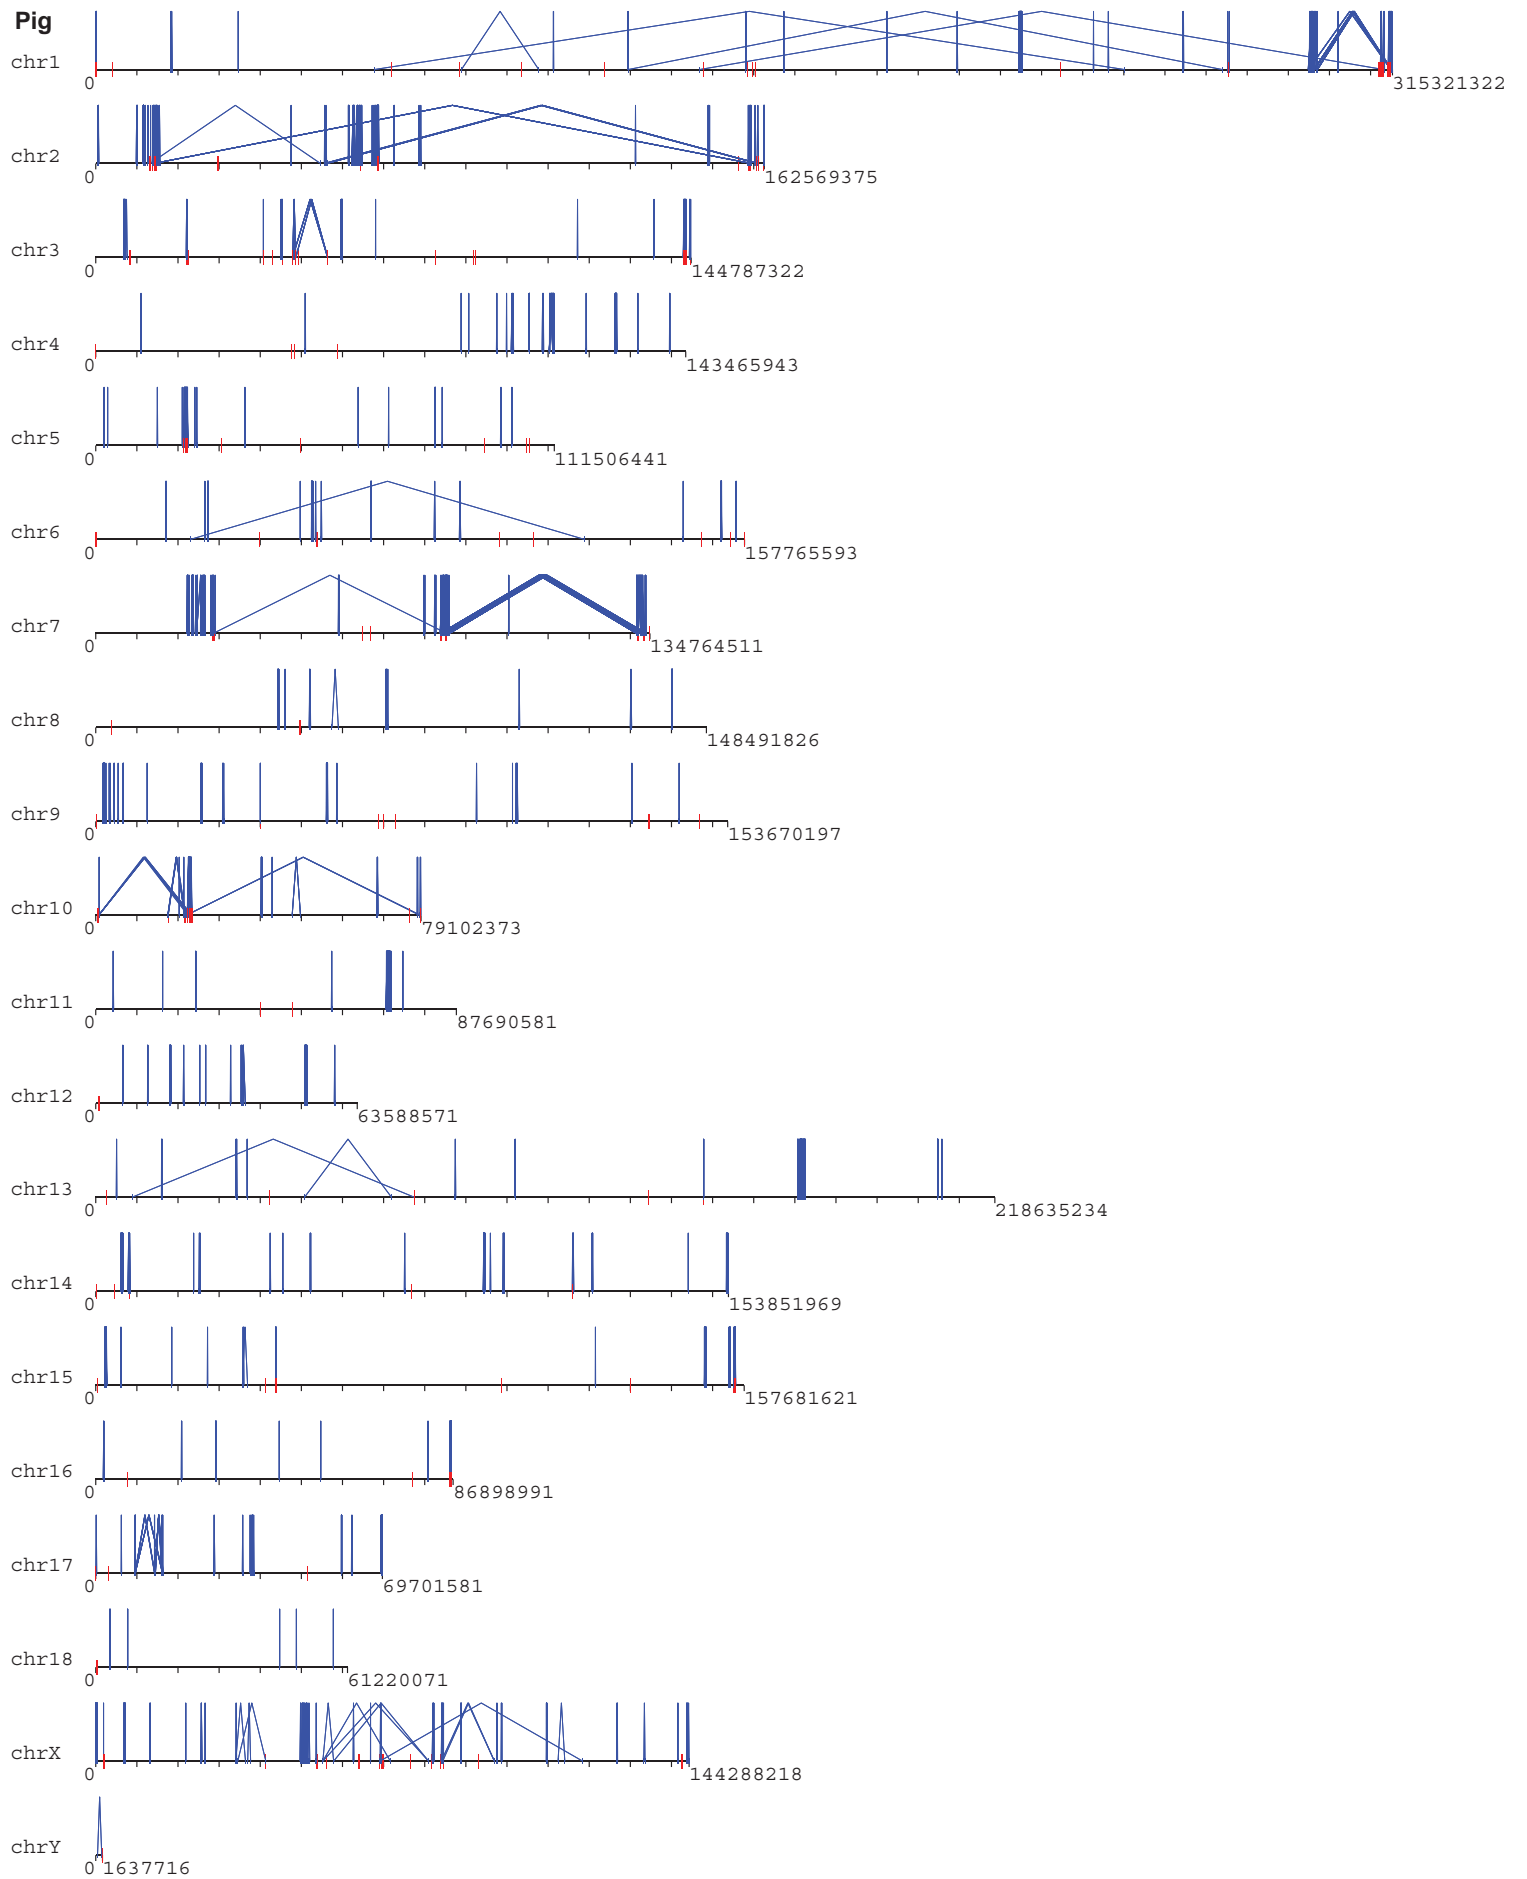

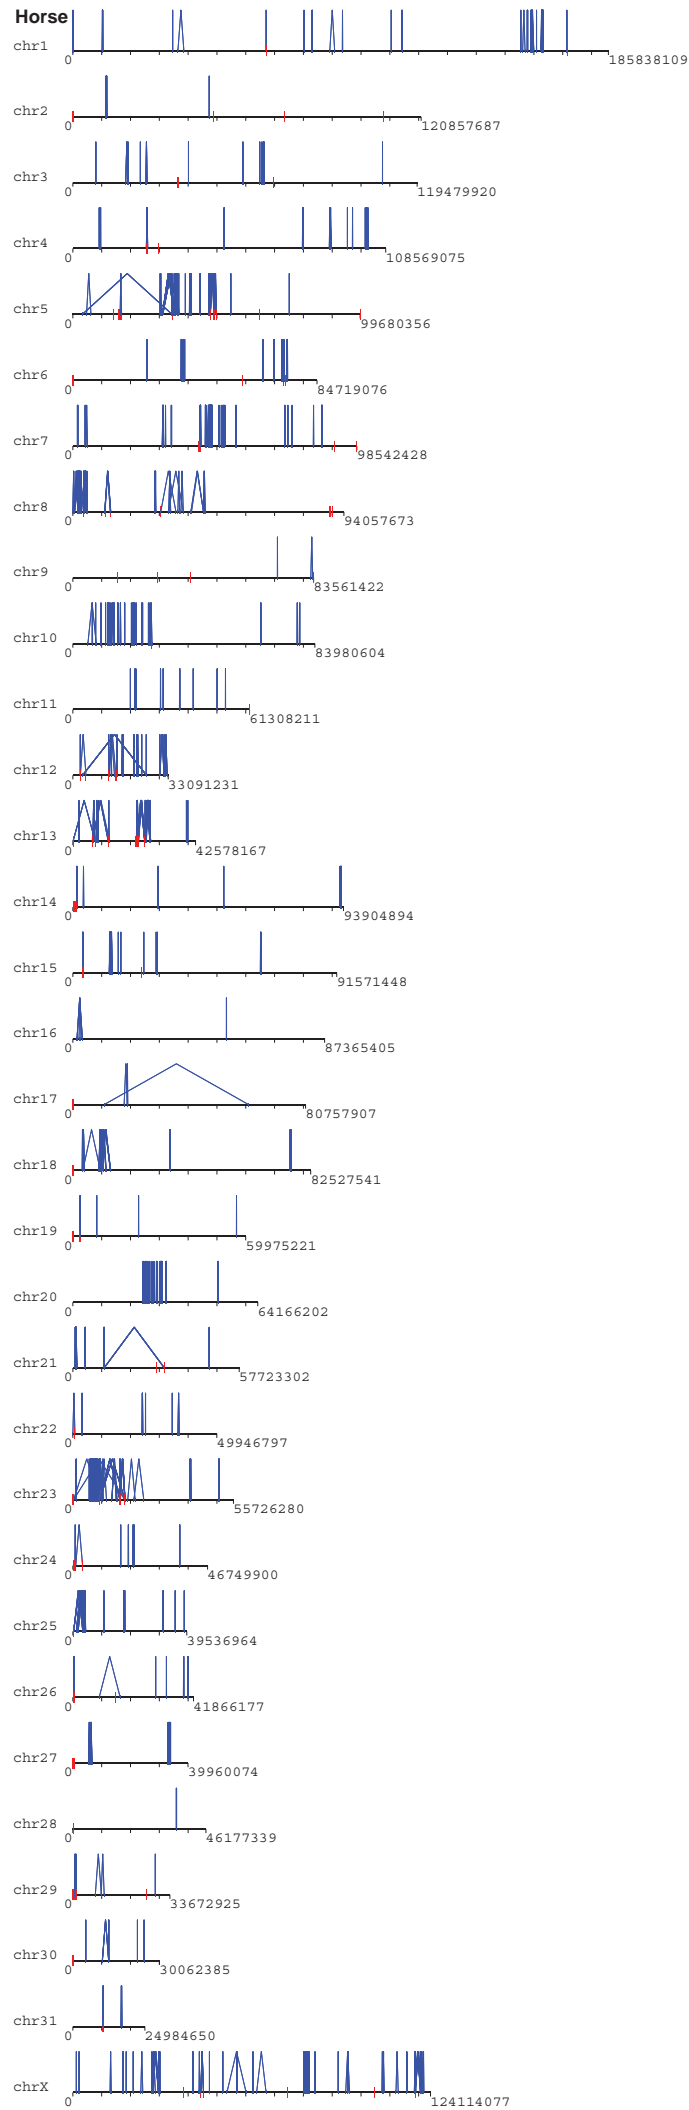

**Rabbit**

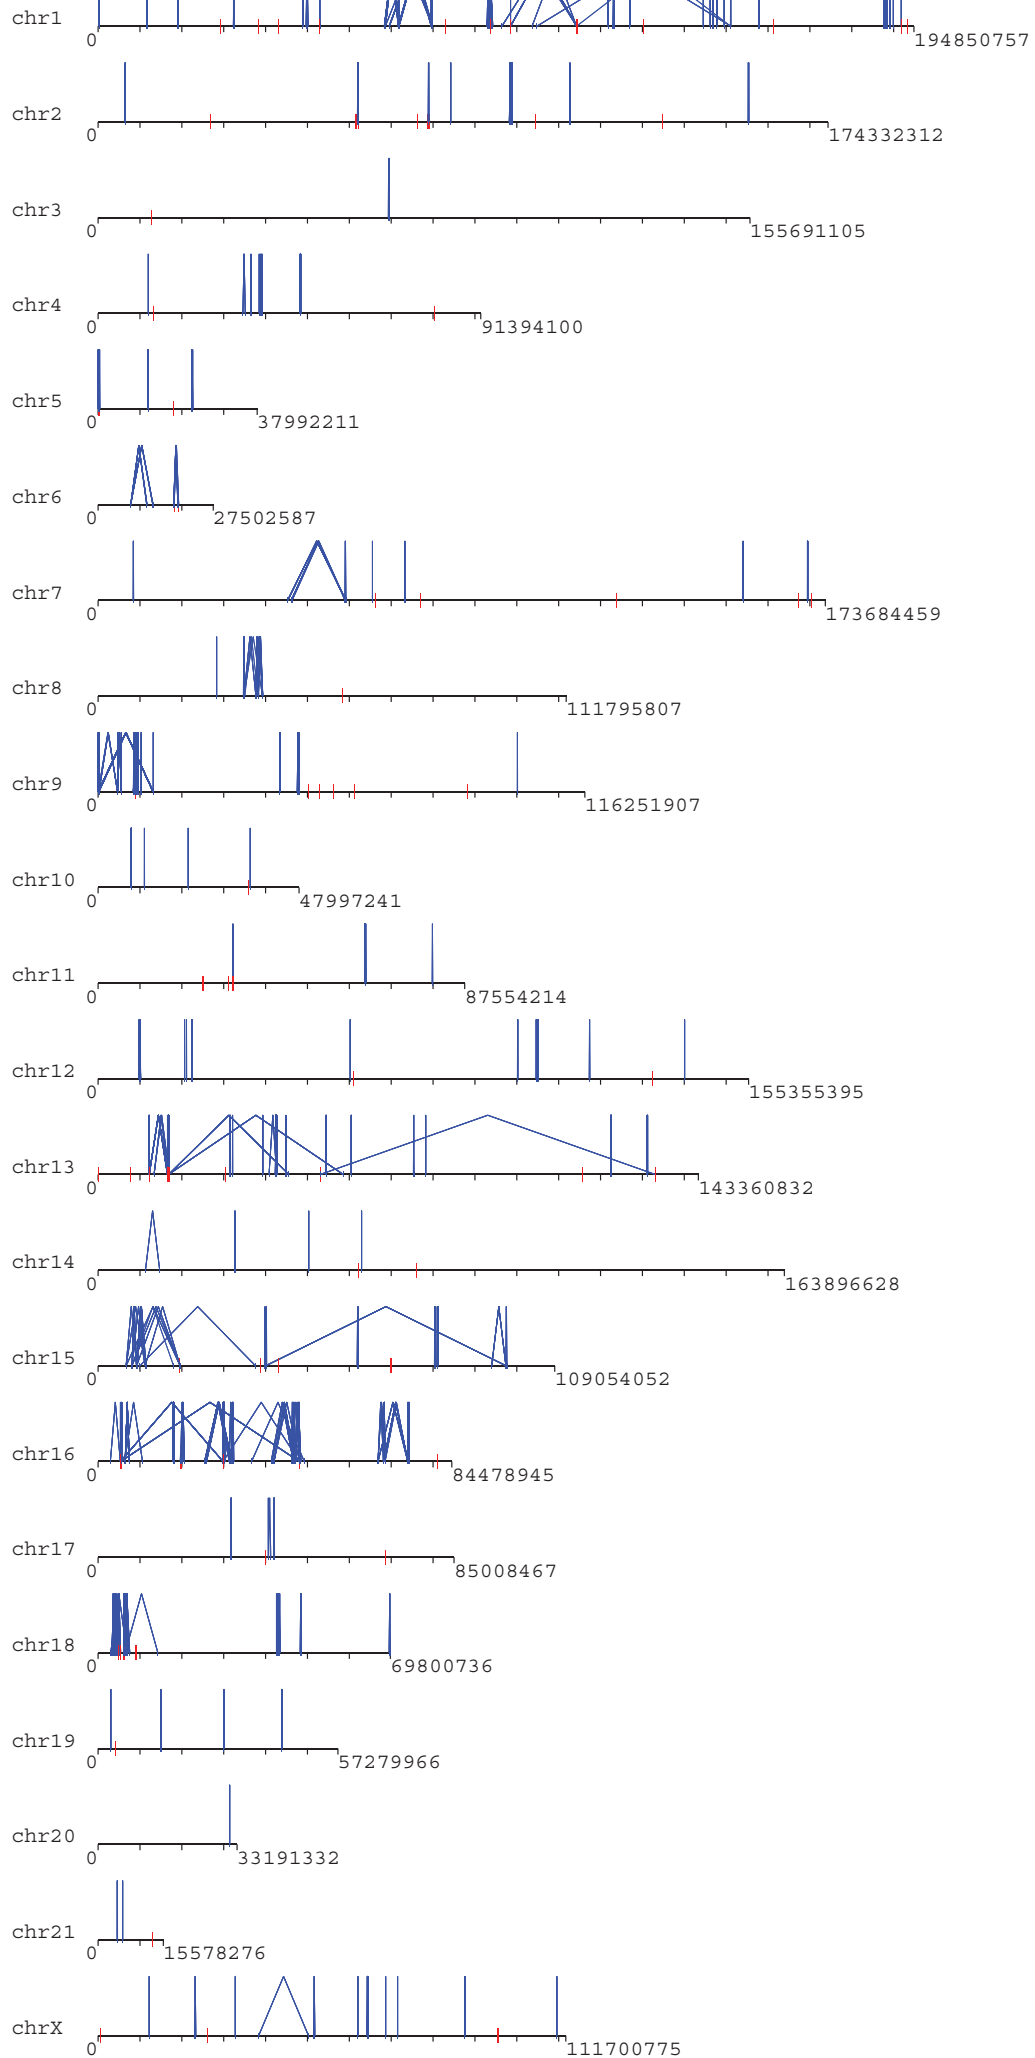

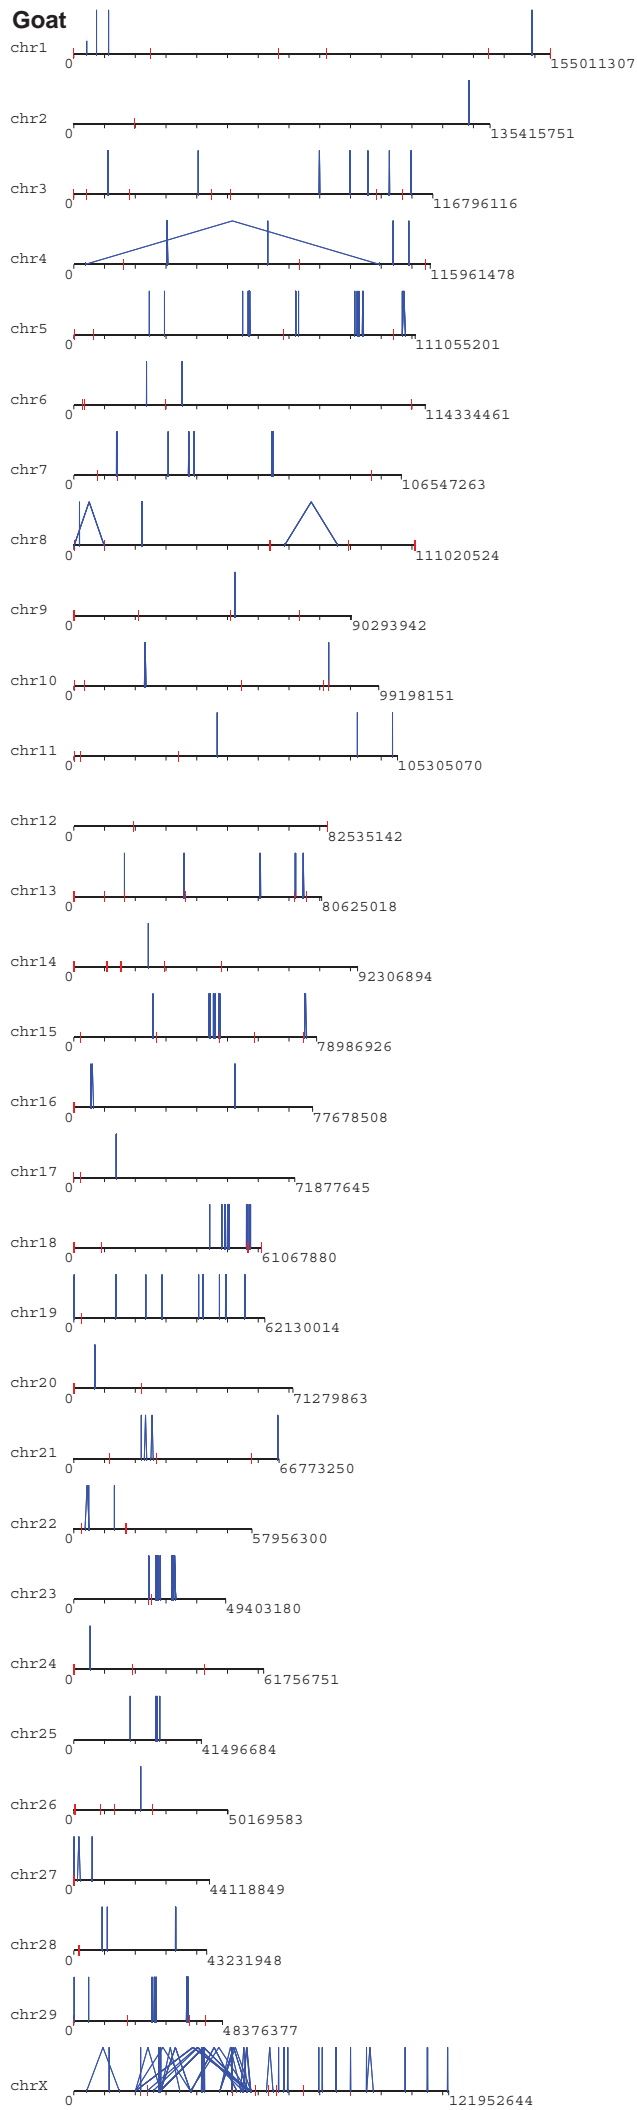

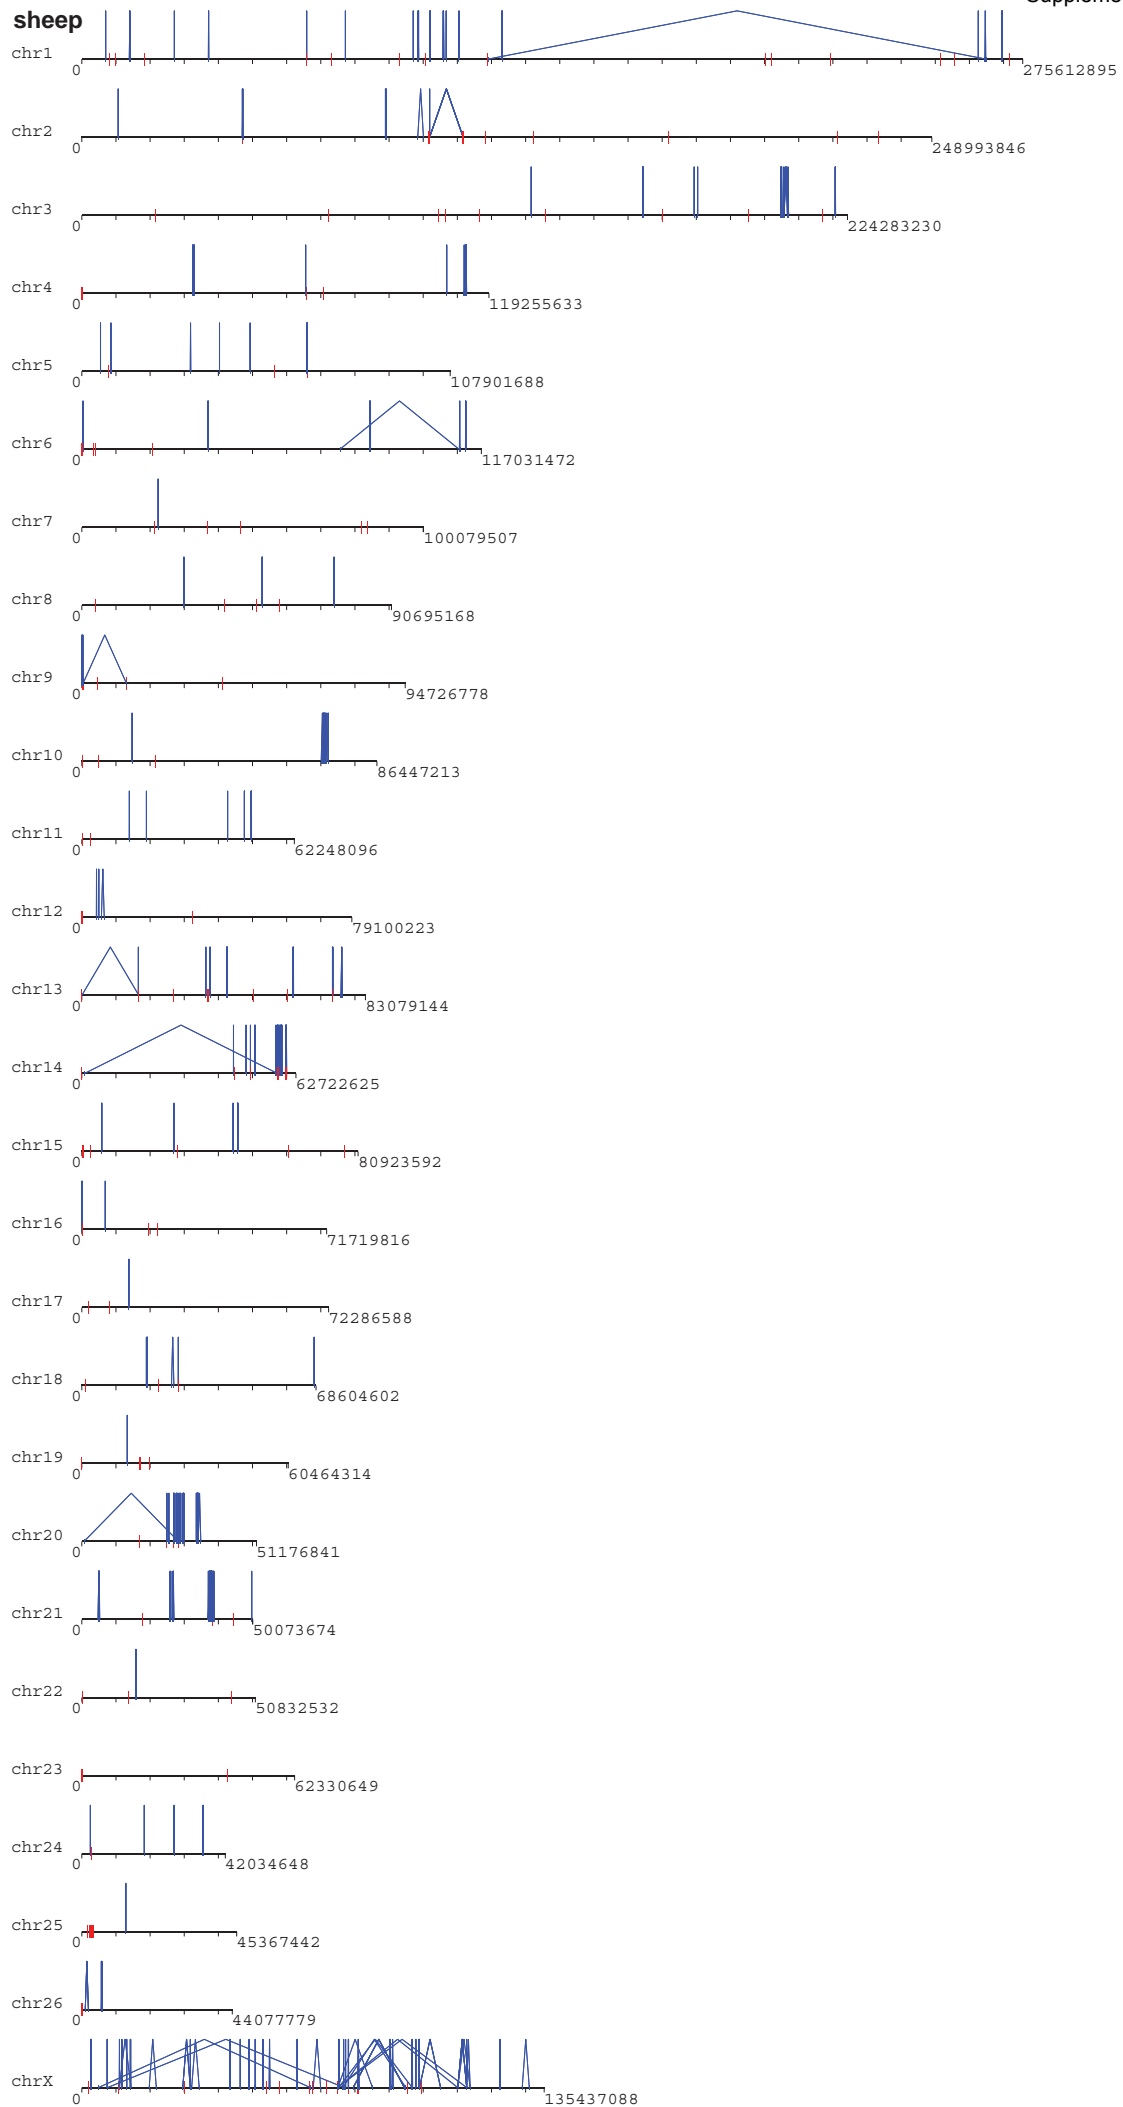

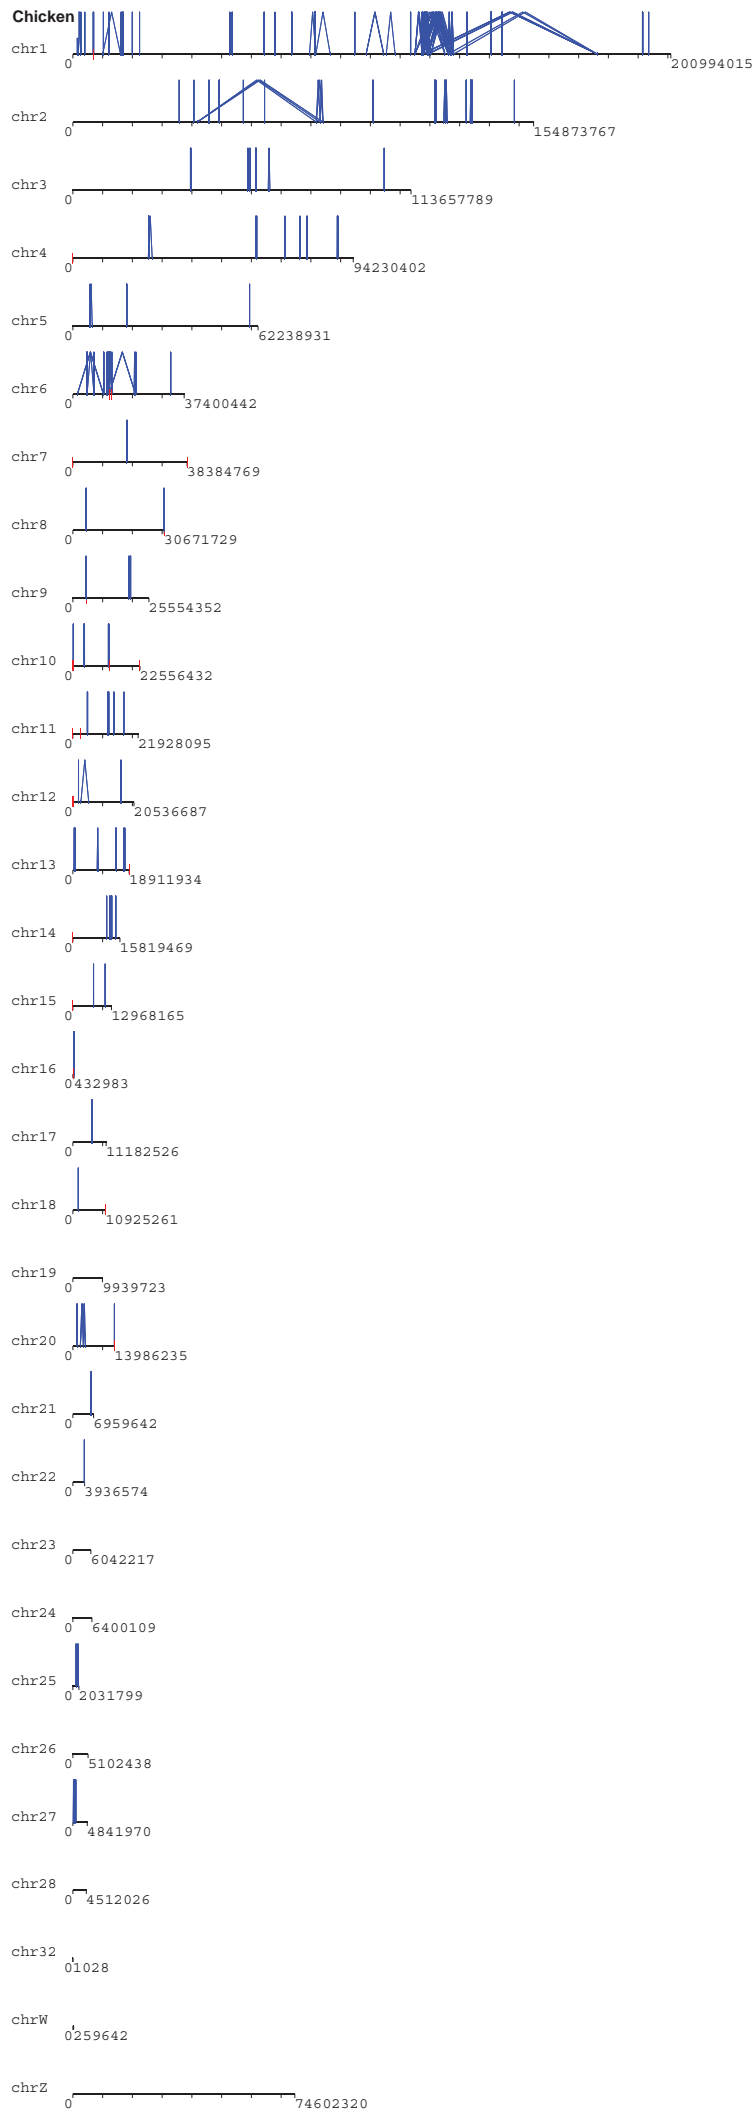



# Cattle

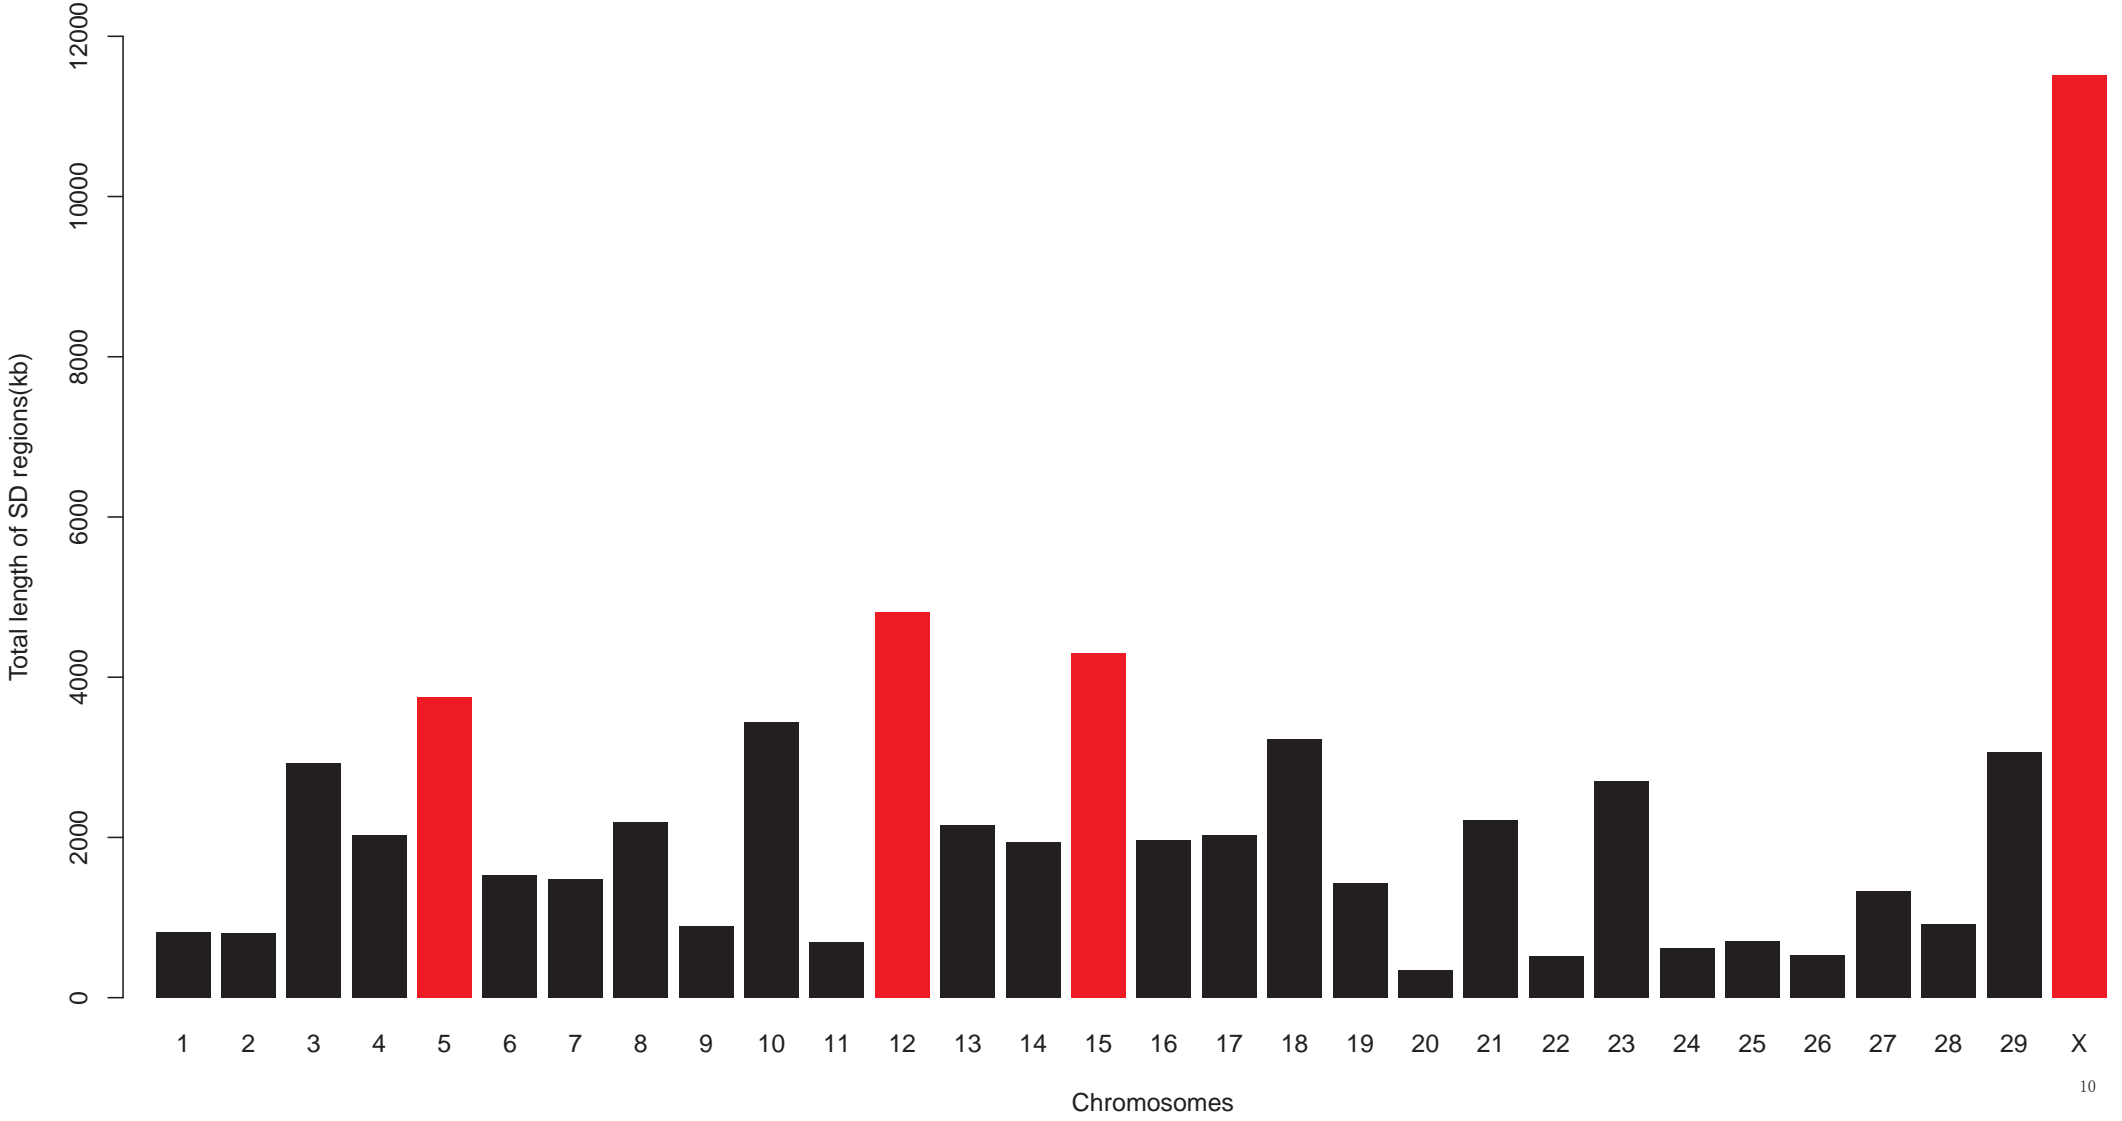

# Pig

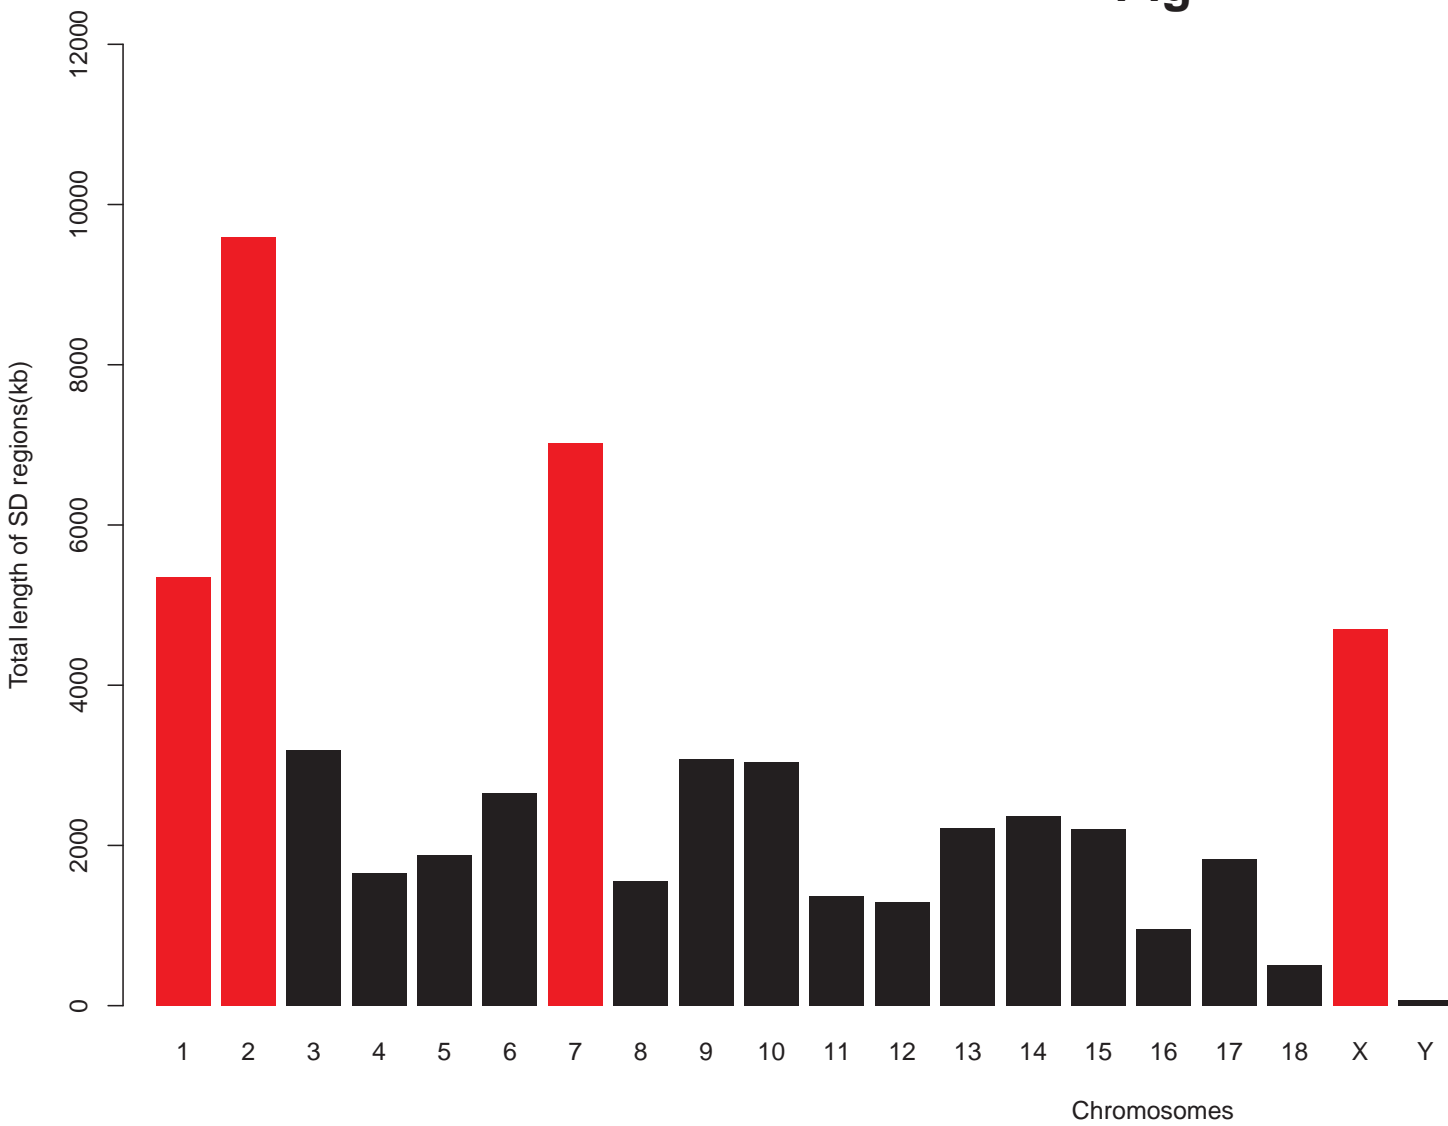

# Horse

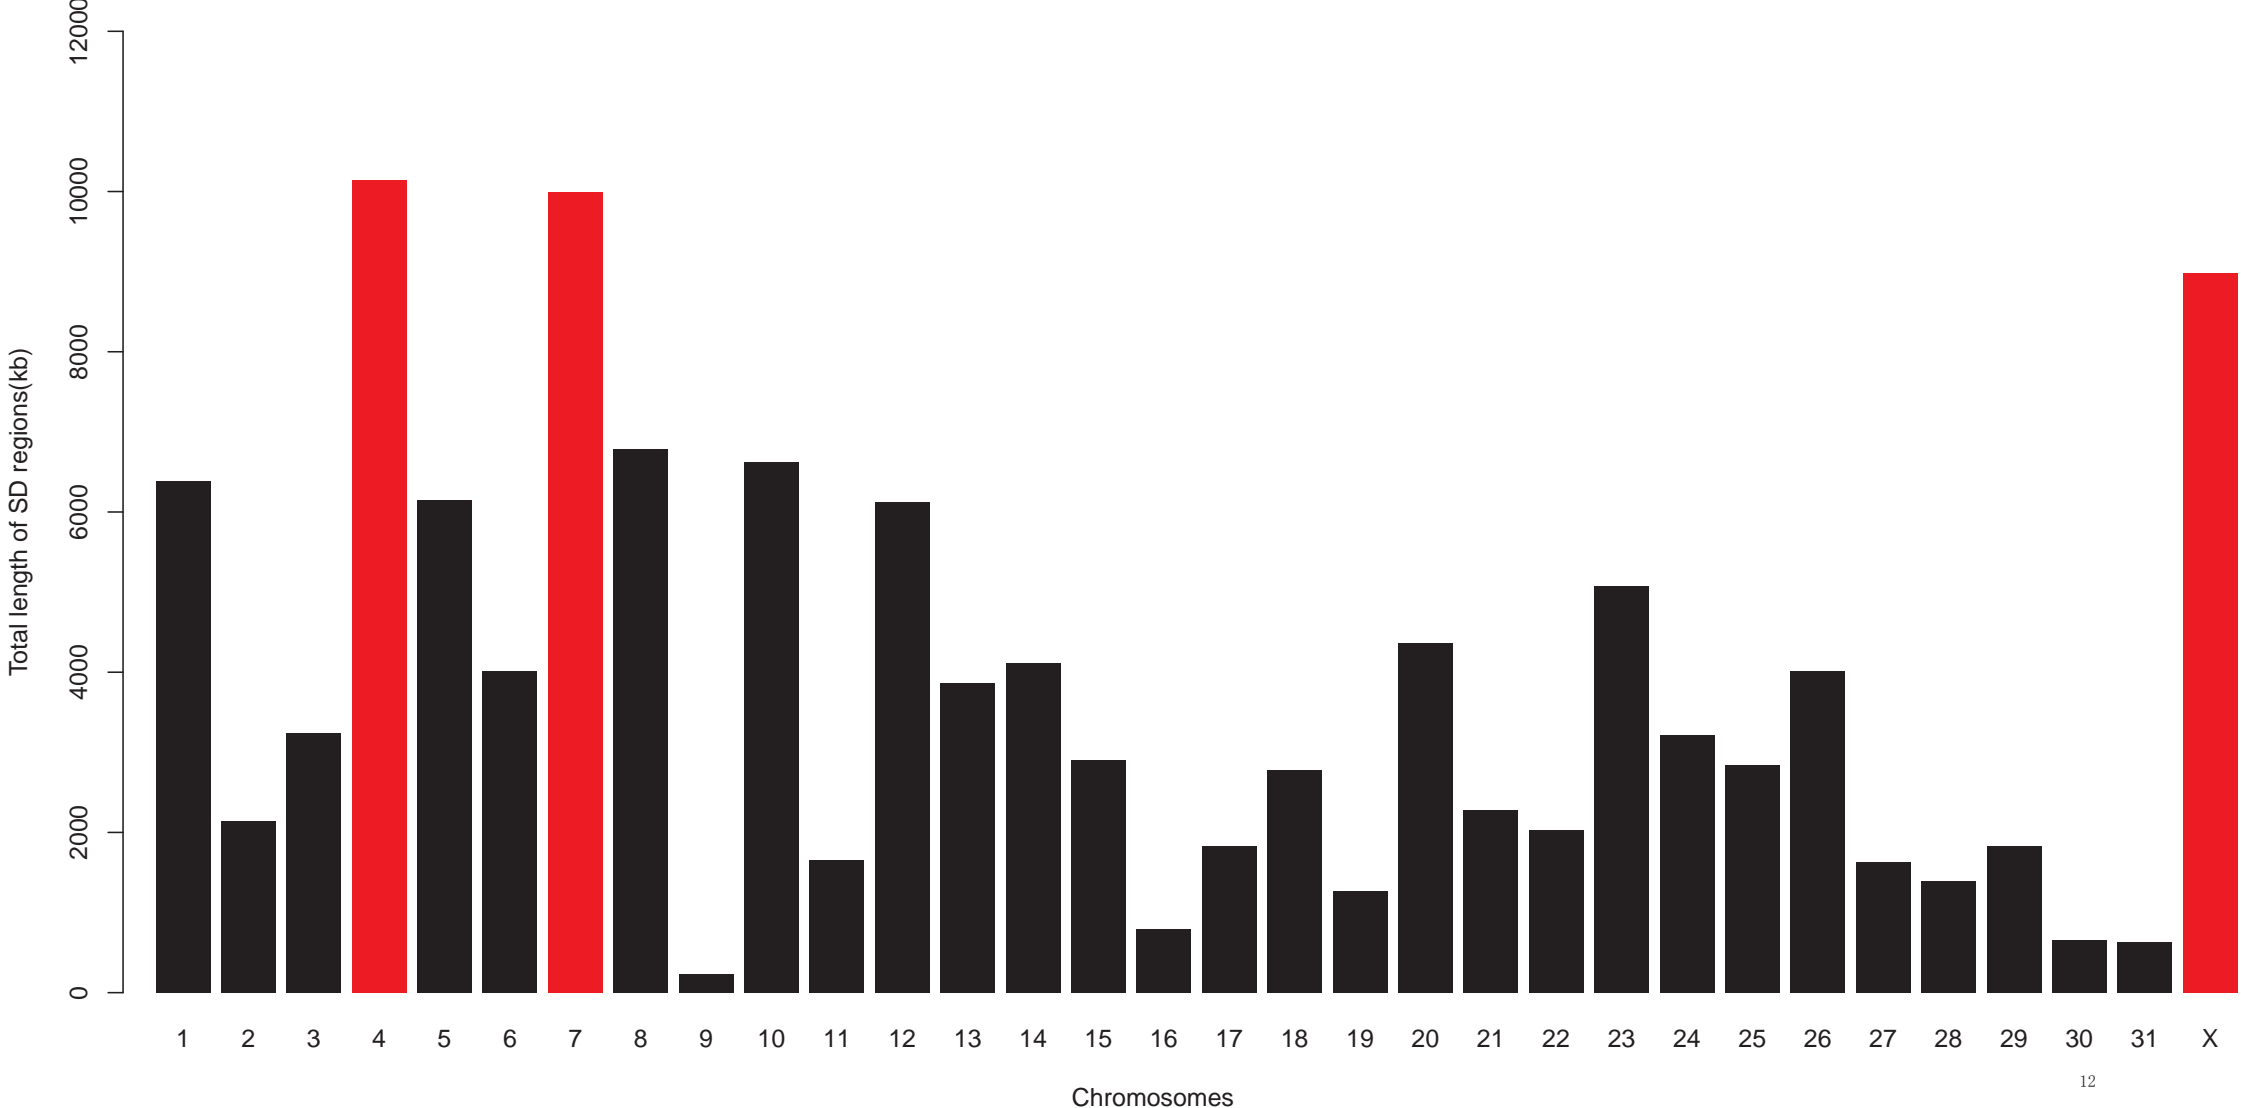

12

# Rabbit

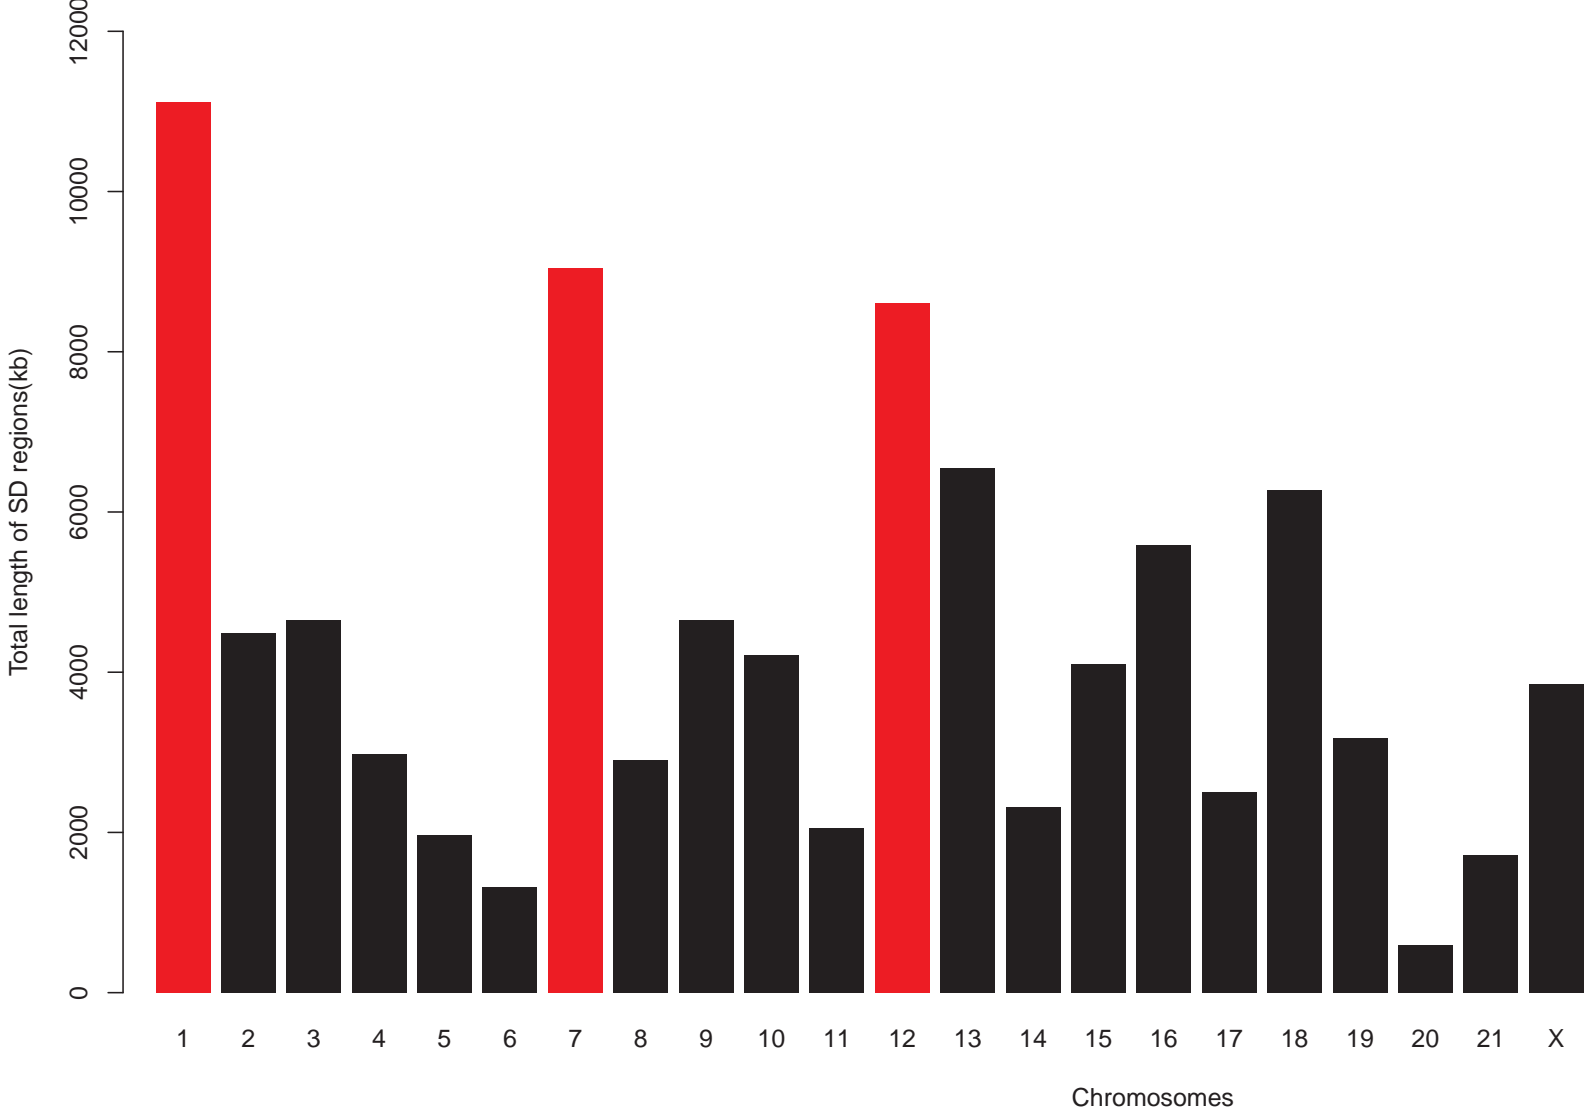

# Goat

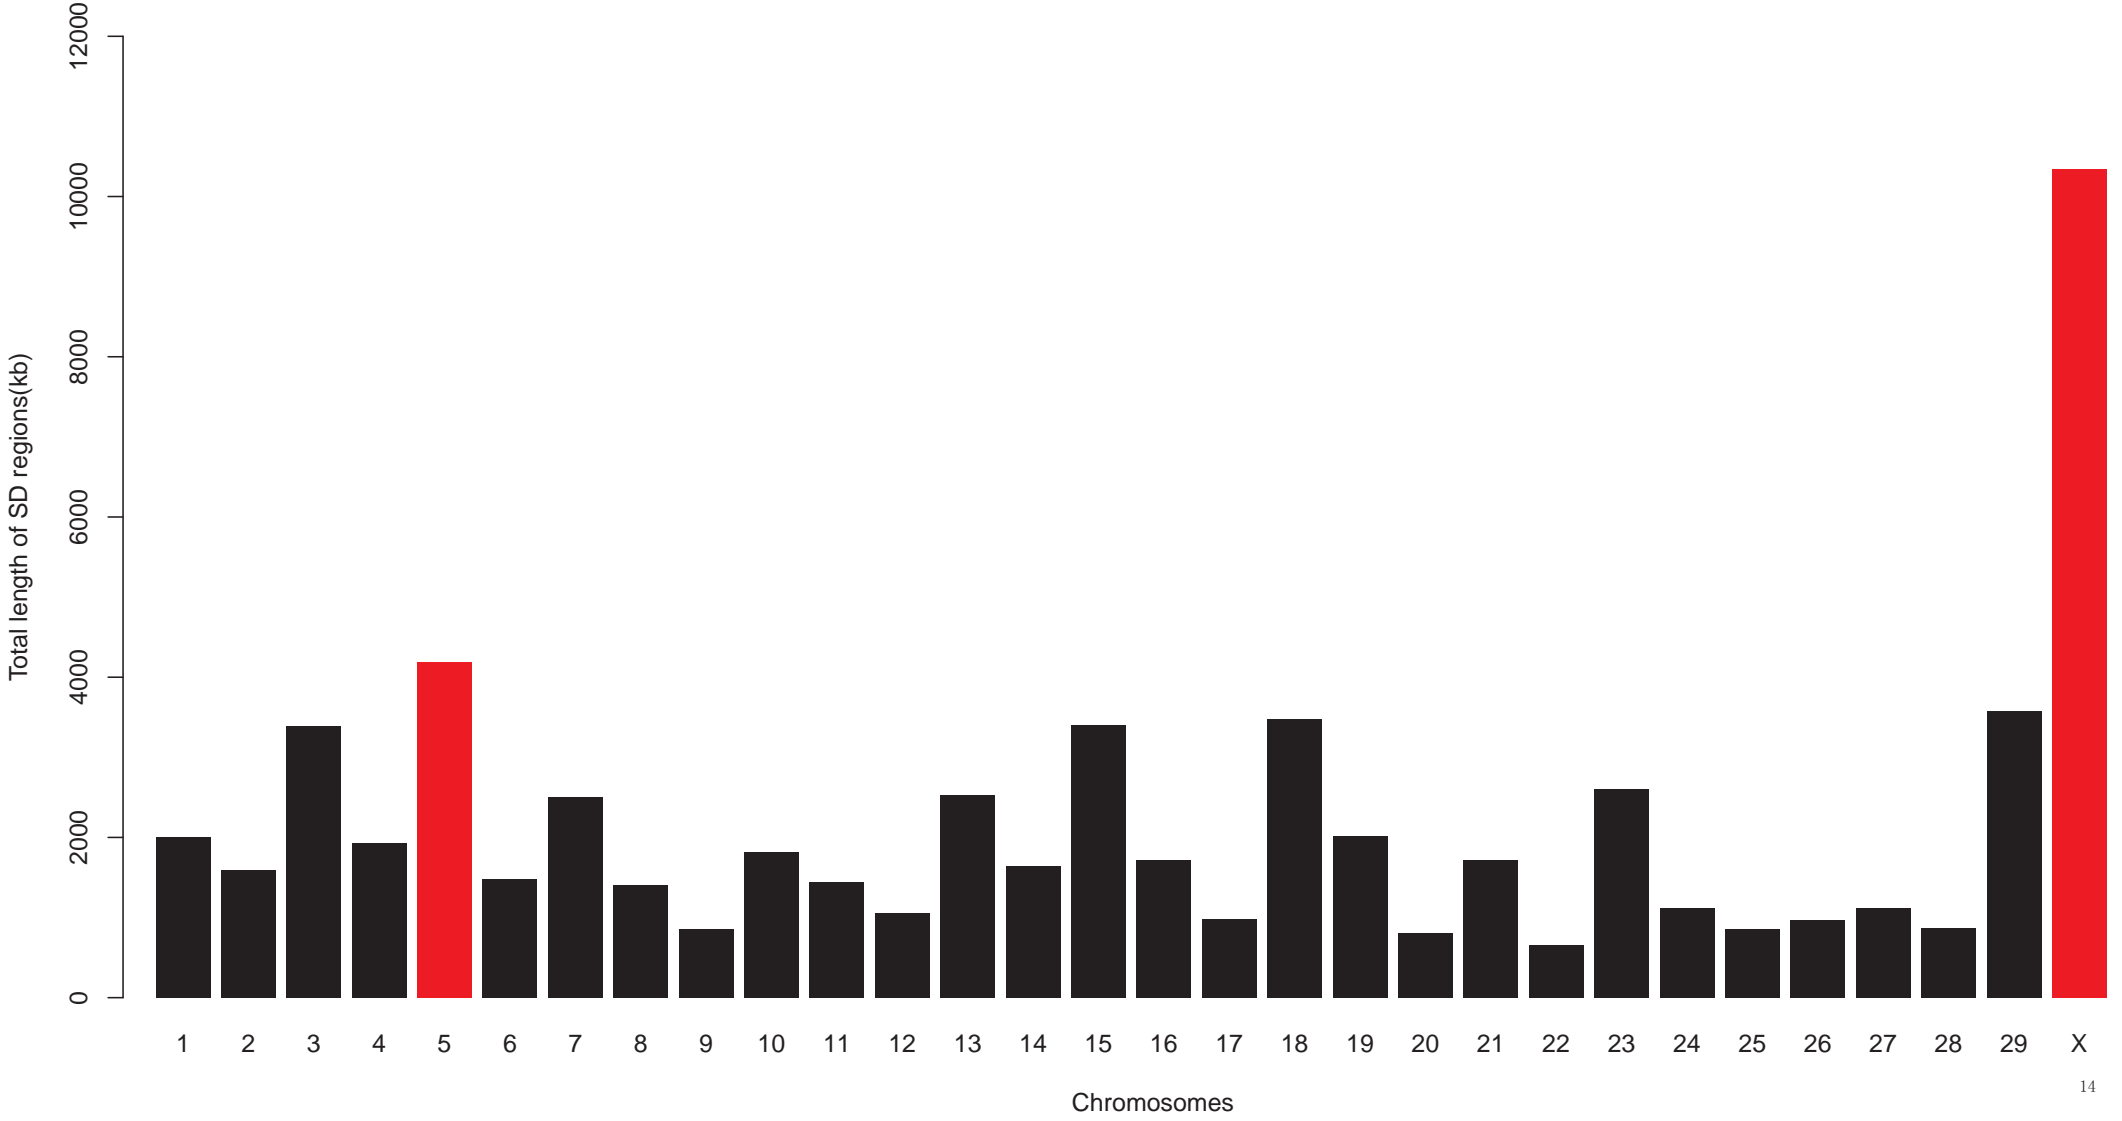

# Sheep

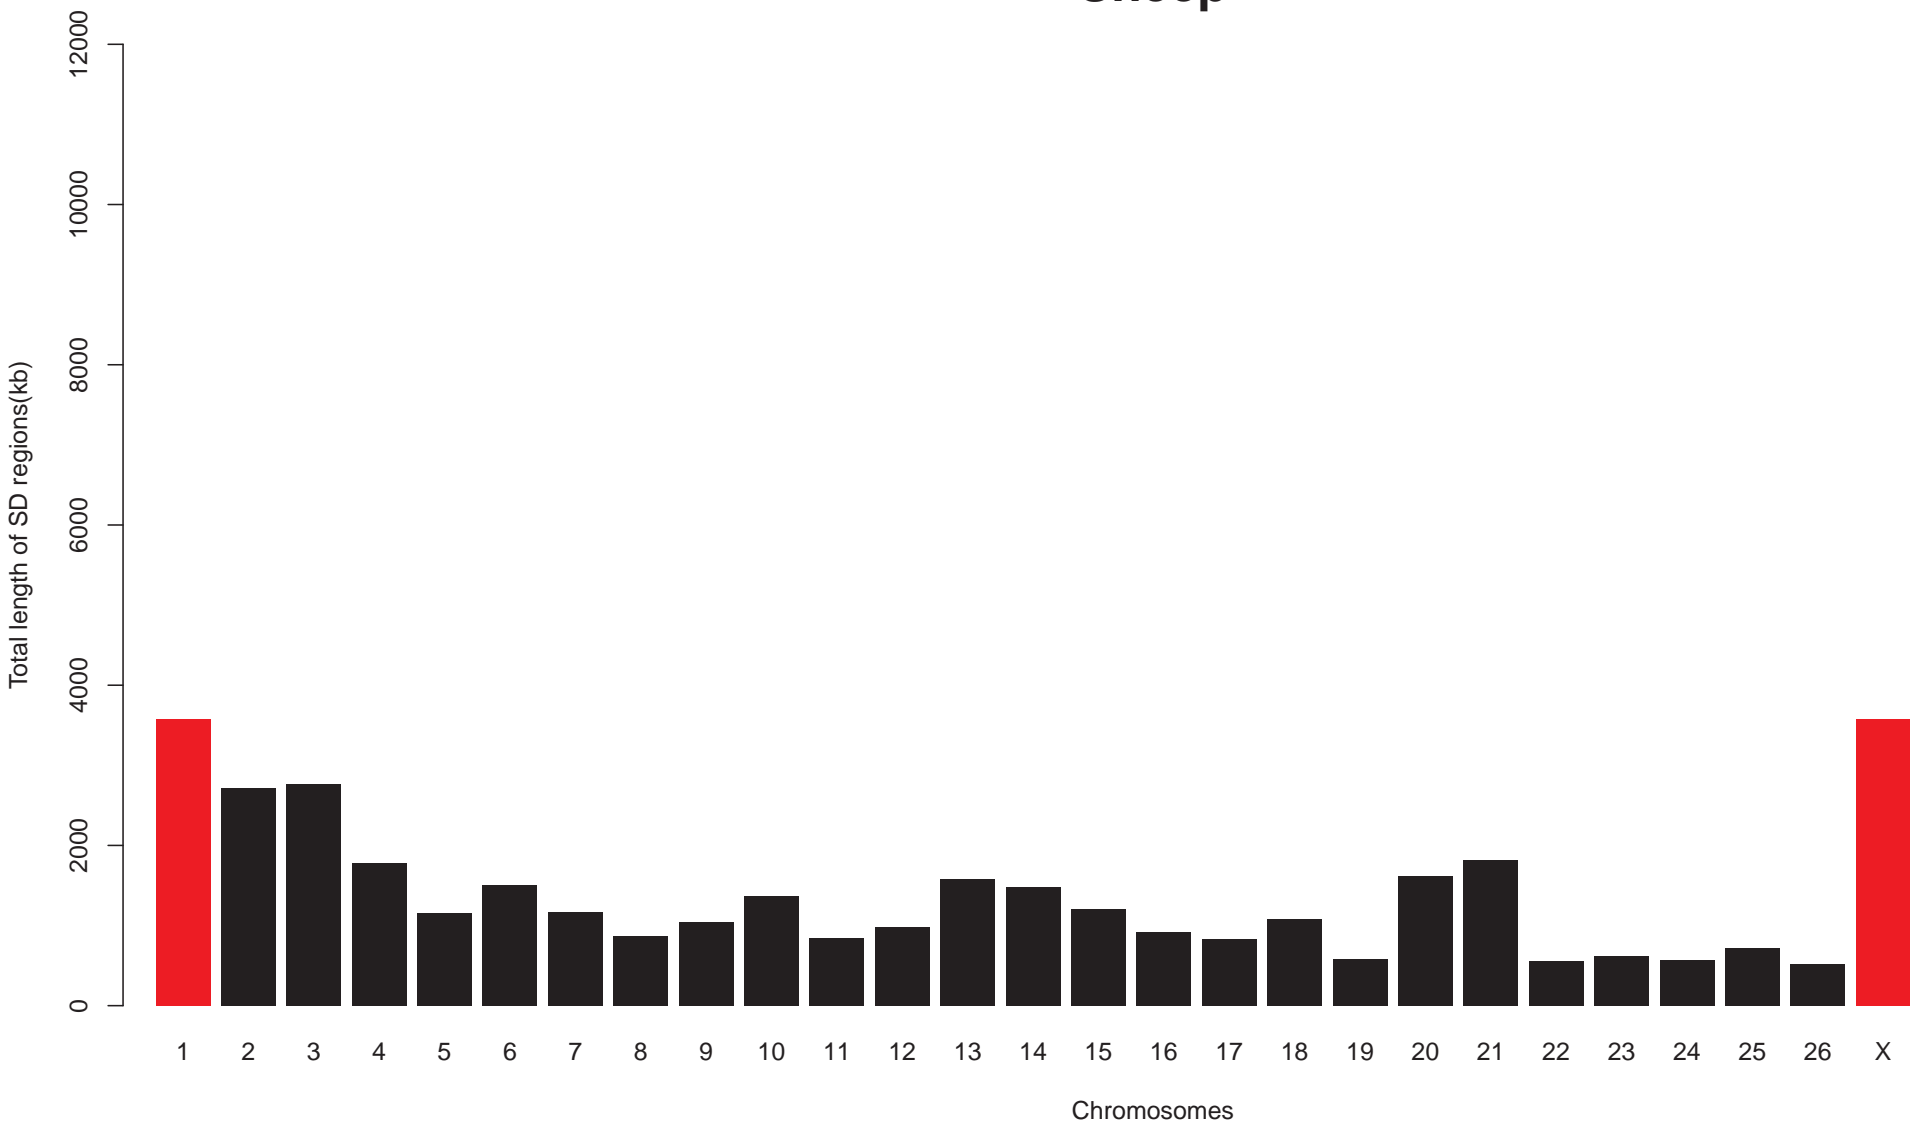

# Chicken

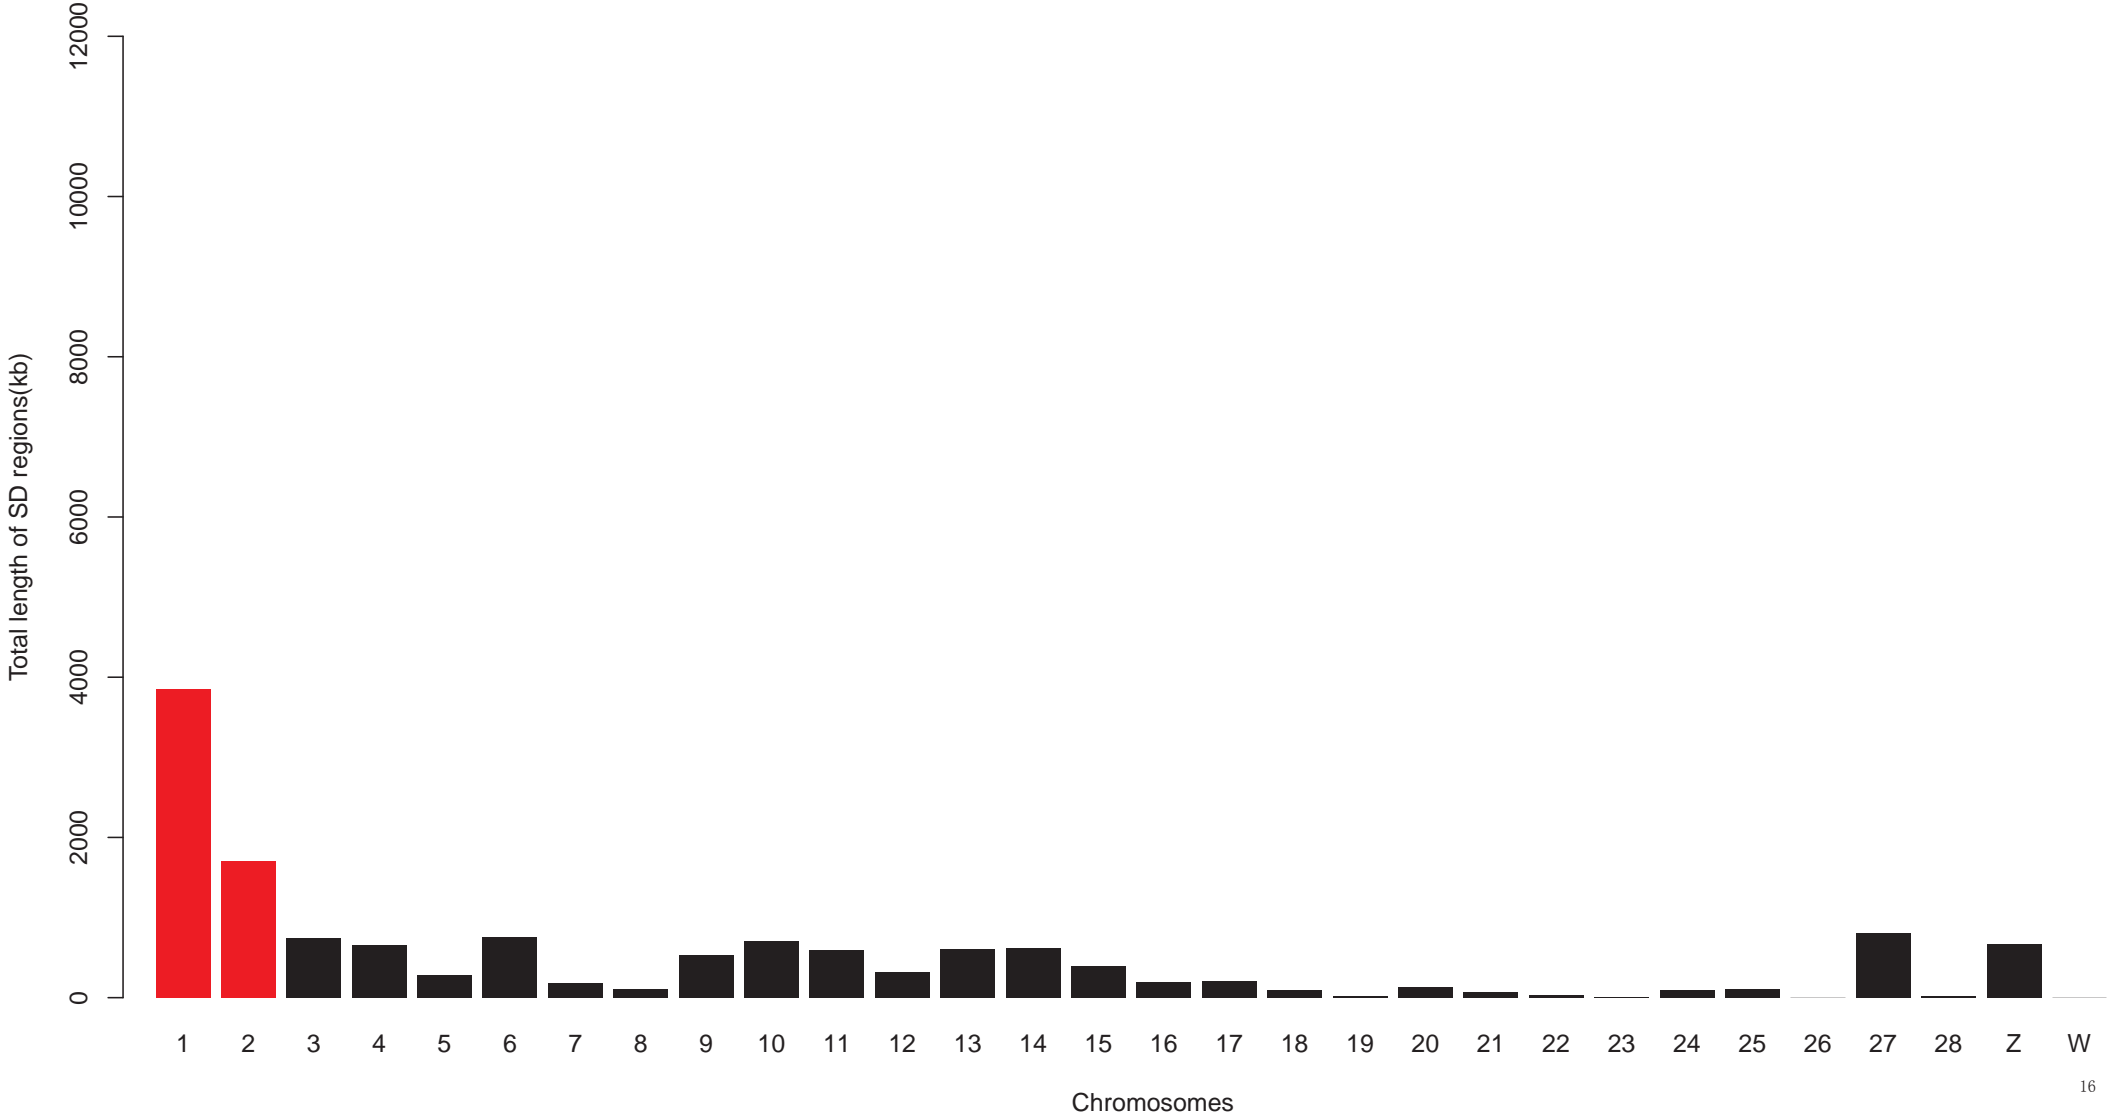

# Cattle

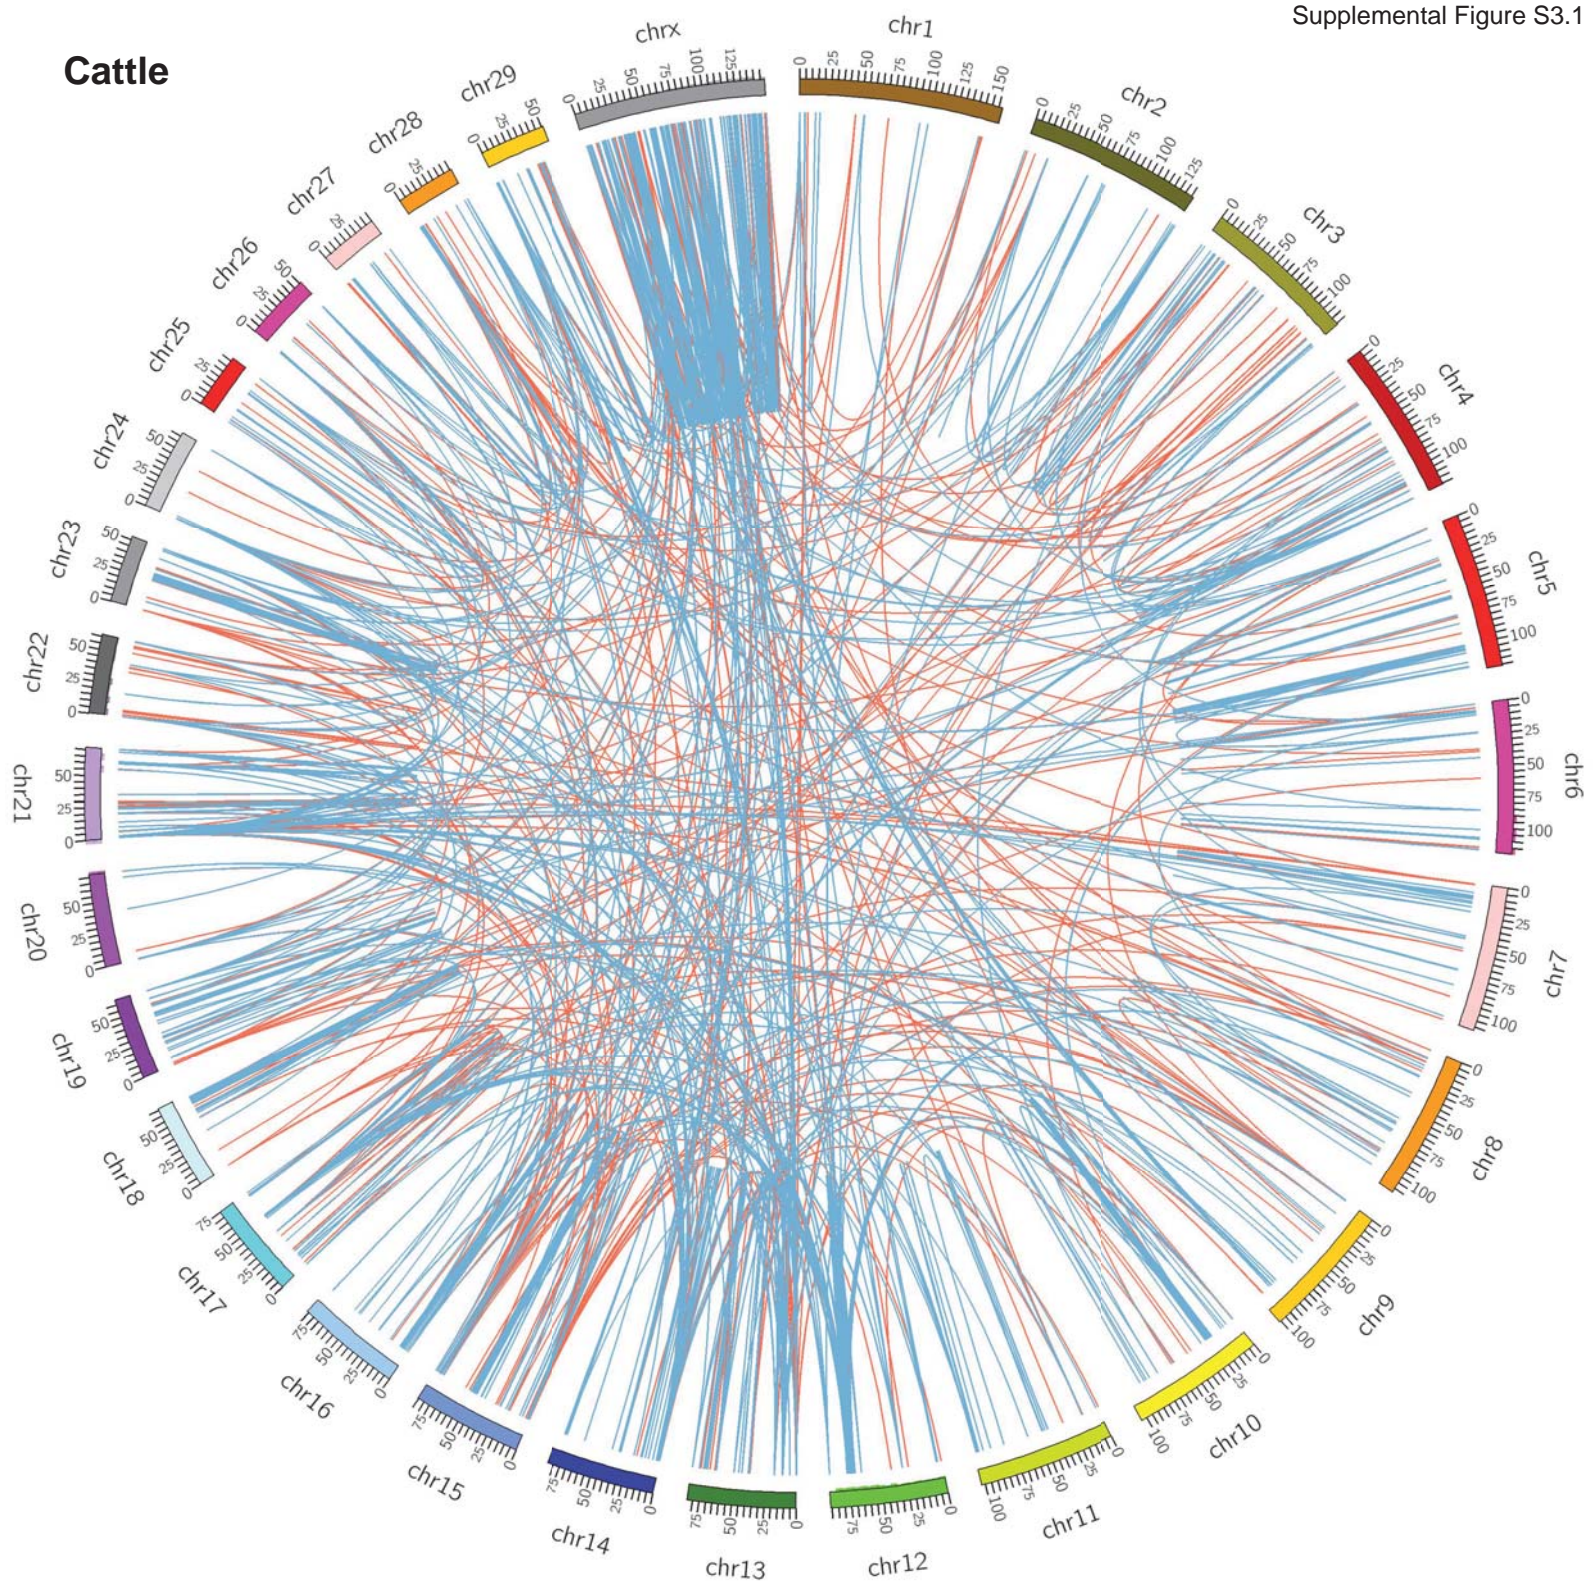



Pig

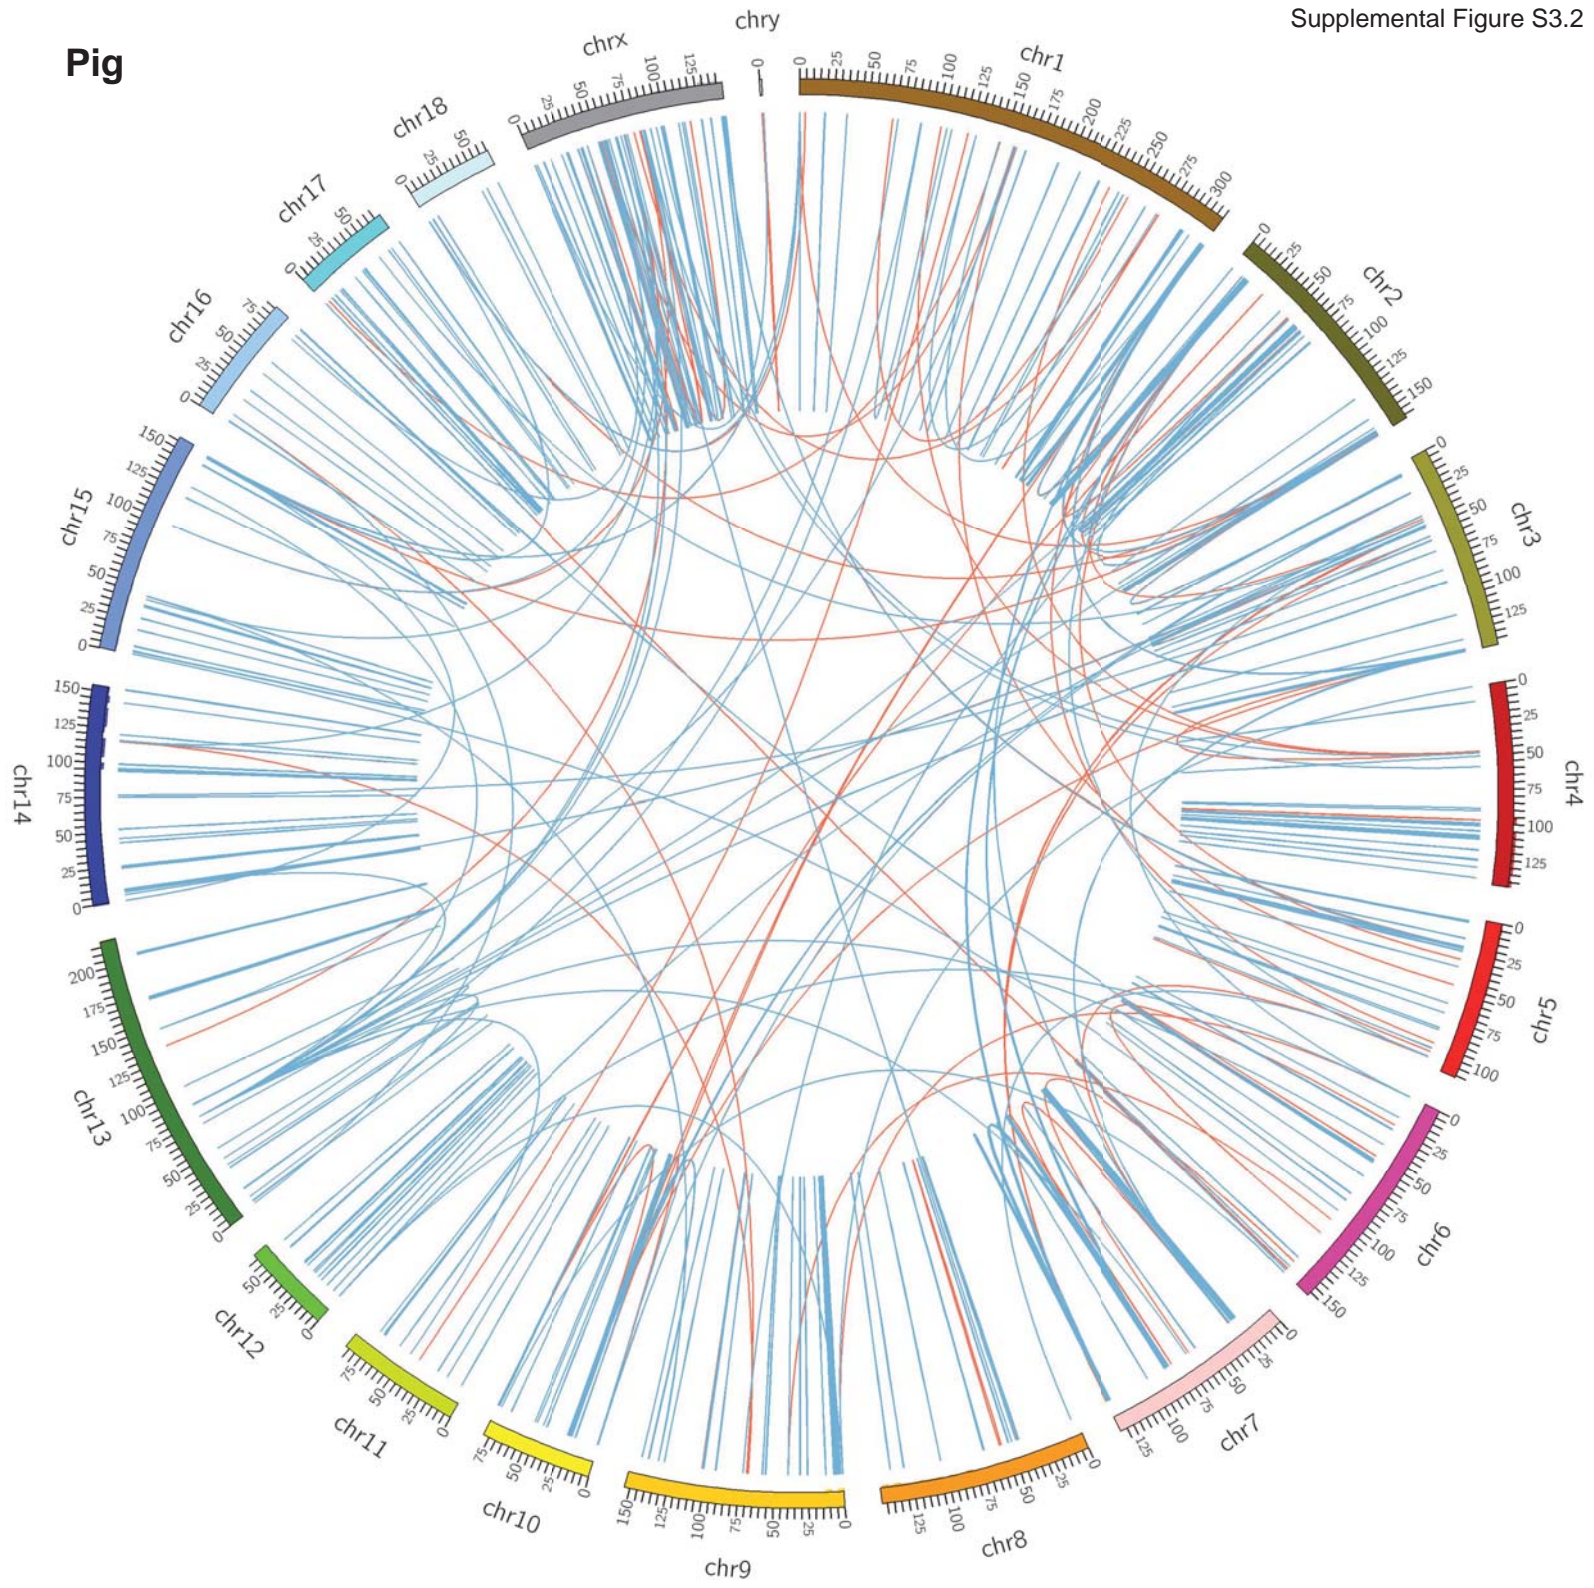



# Horse

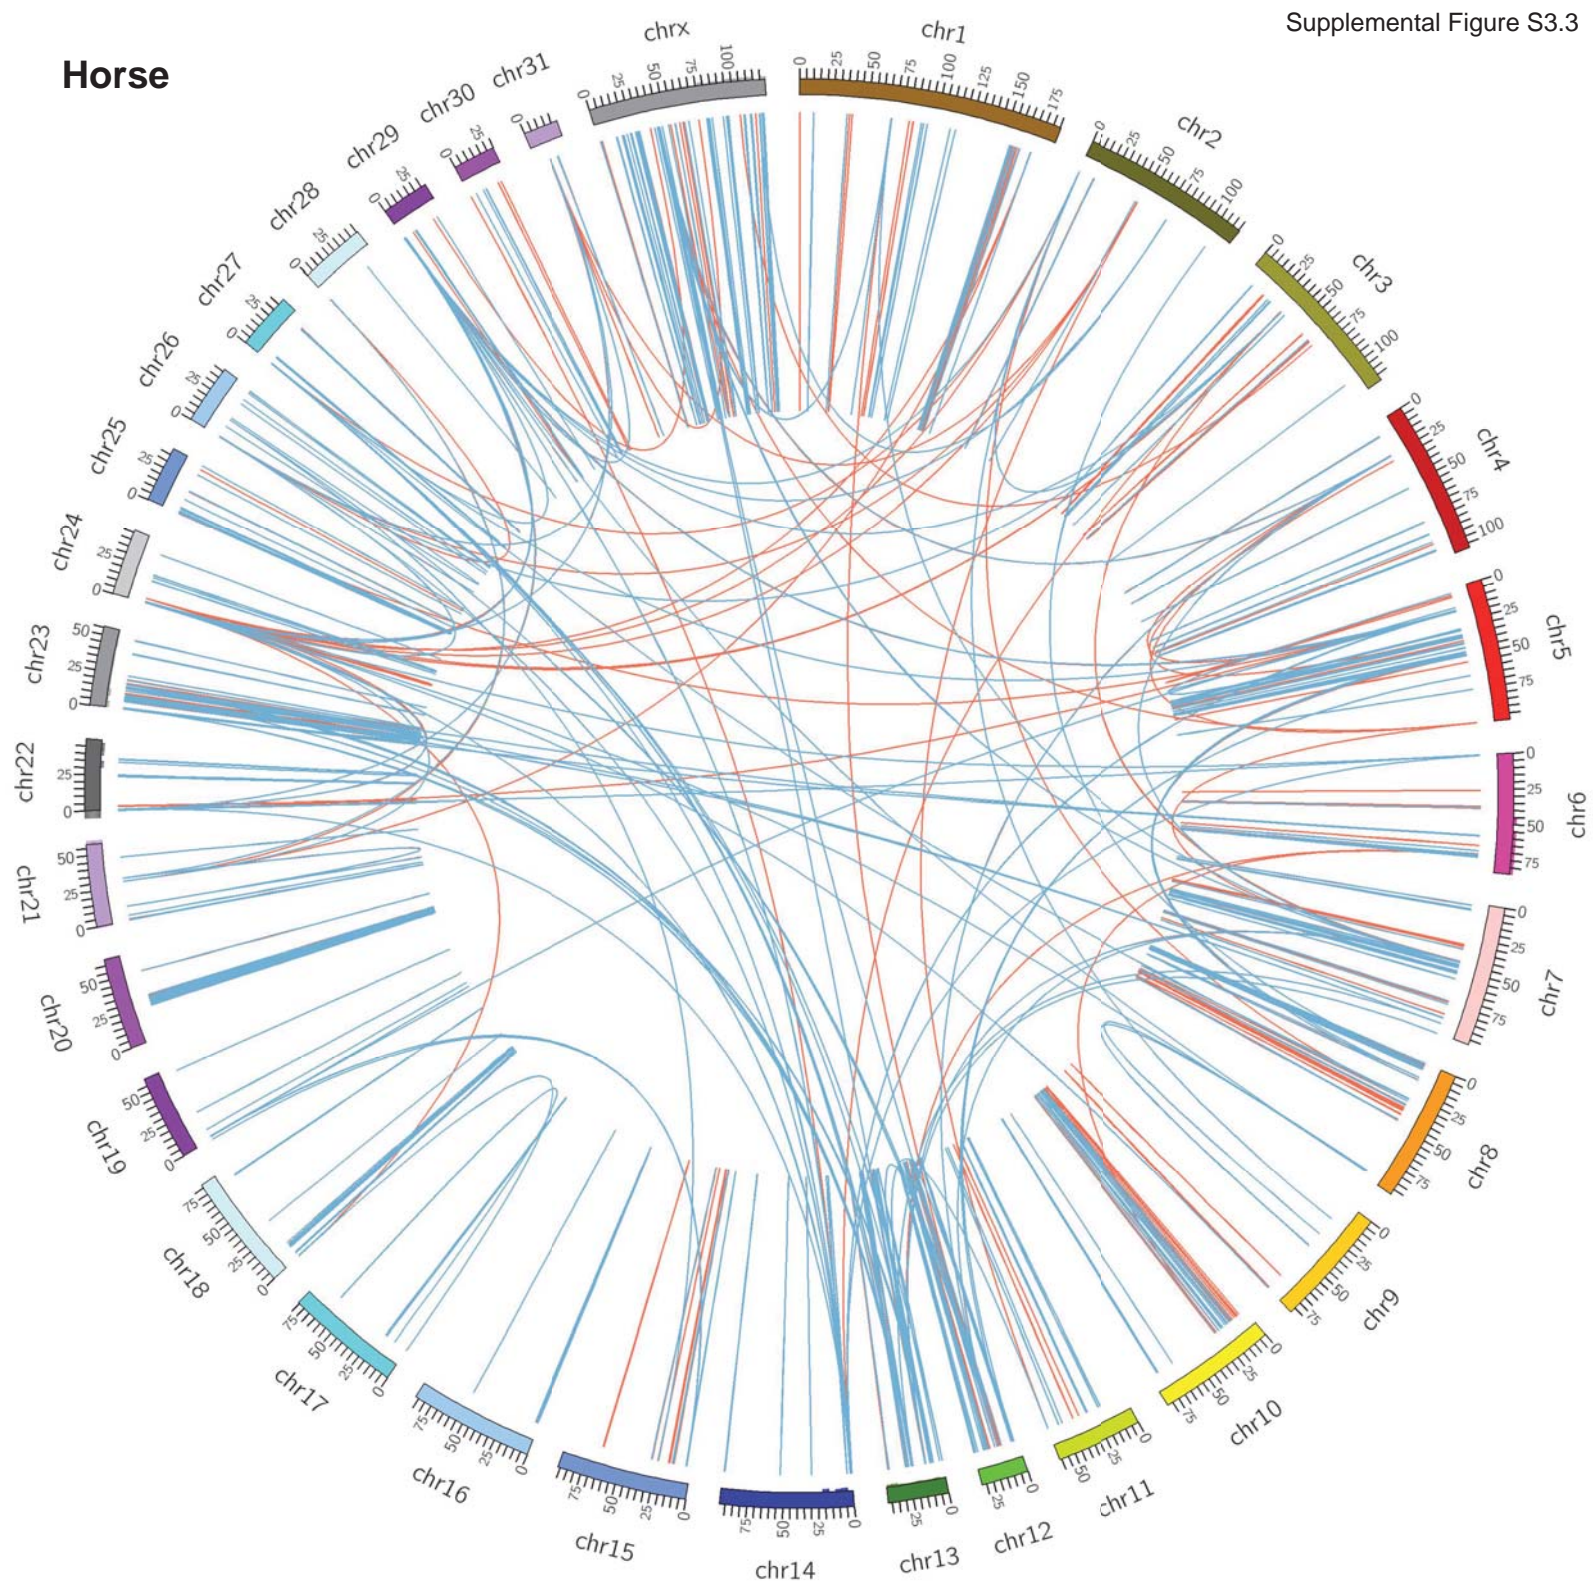



# Rabbit

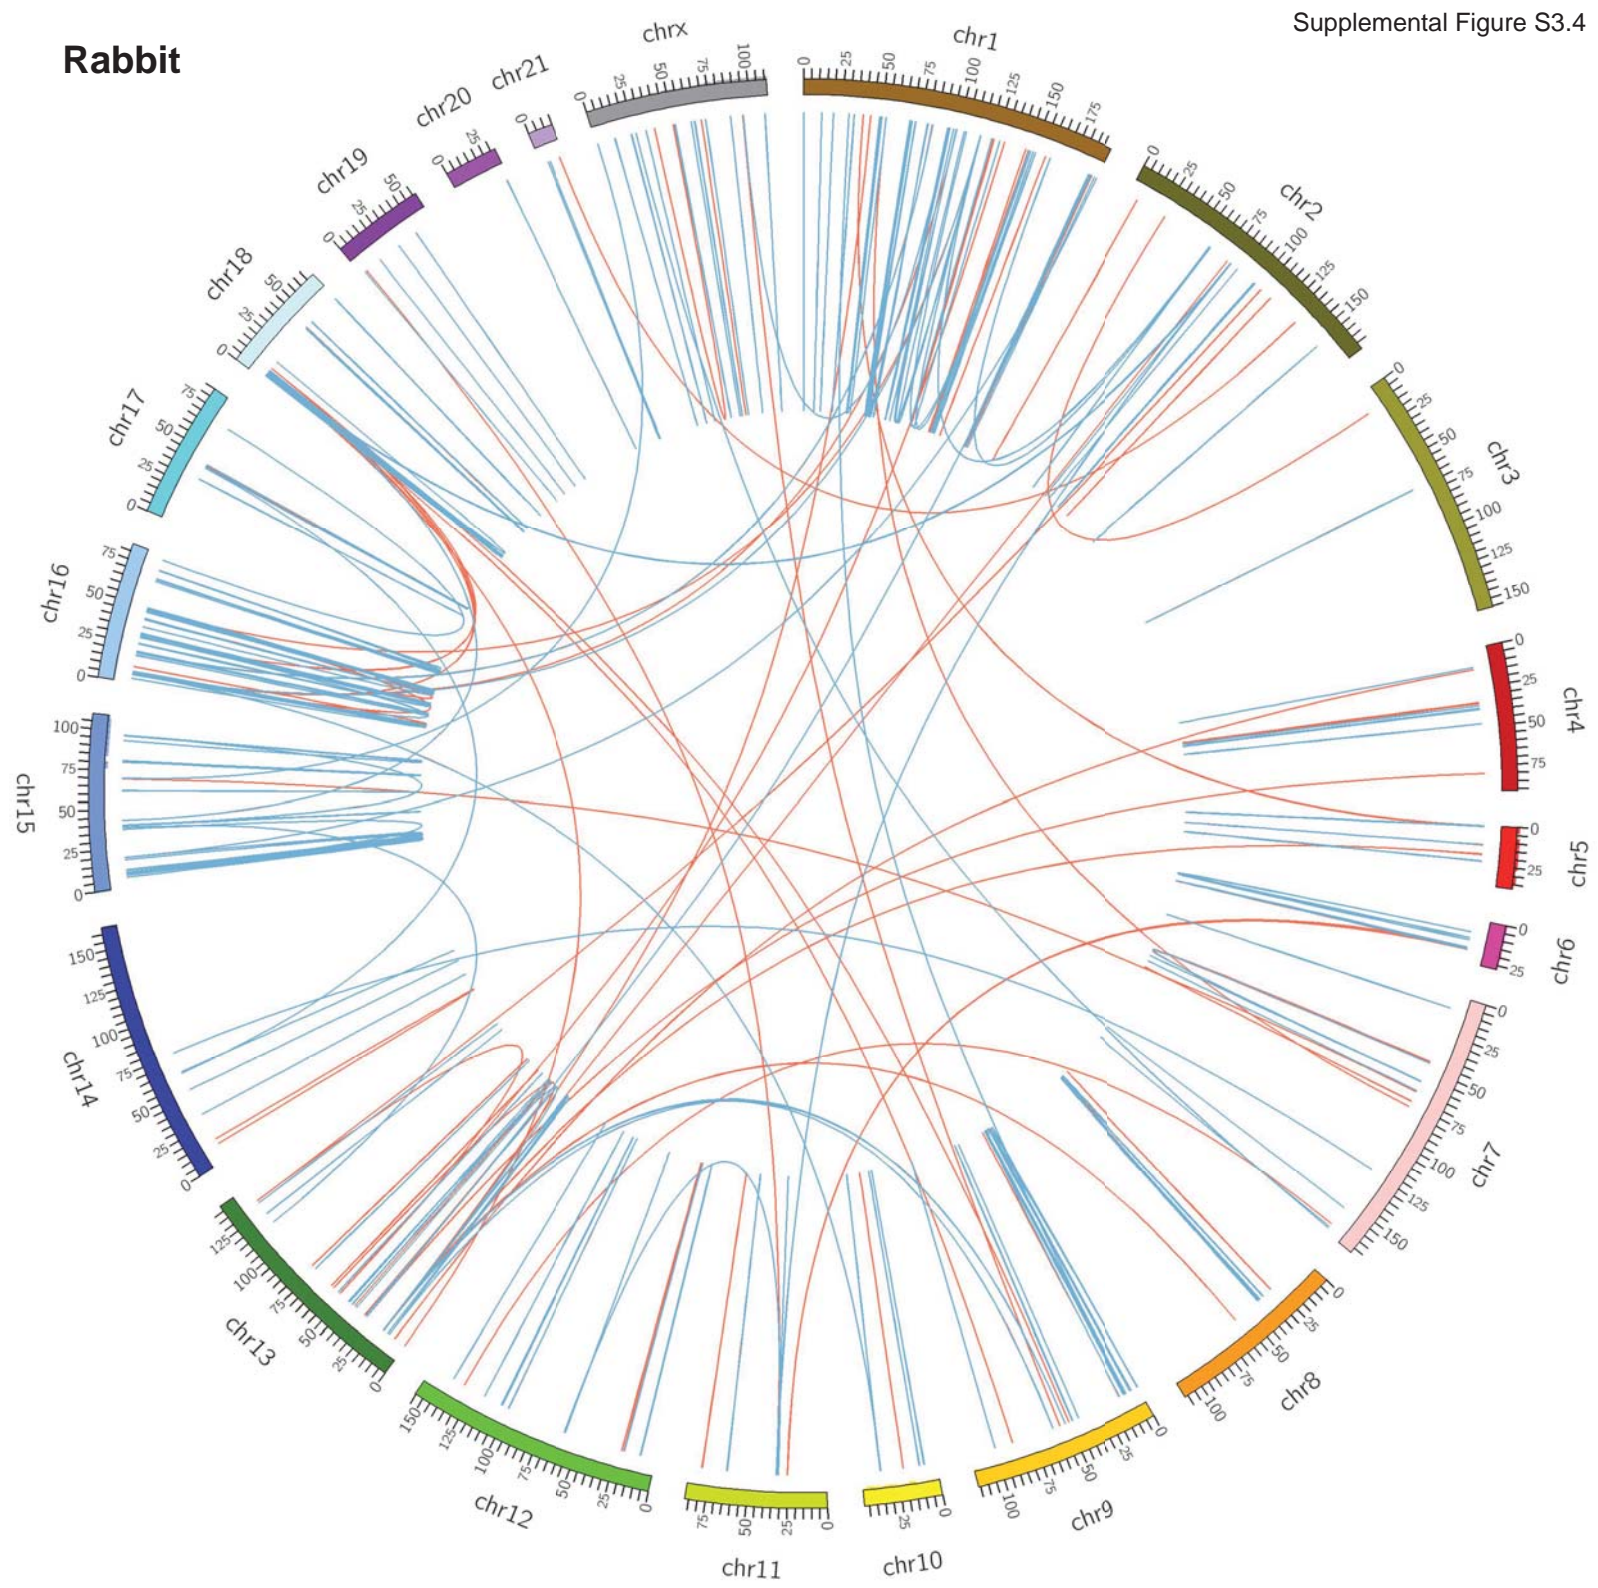



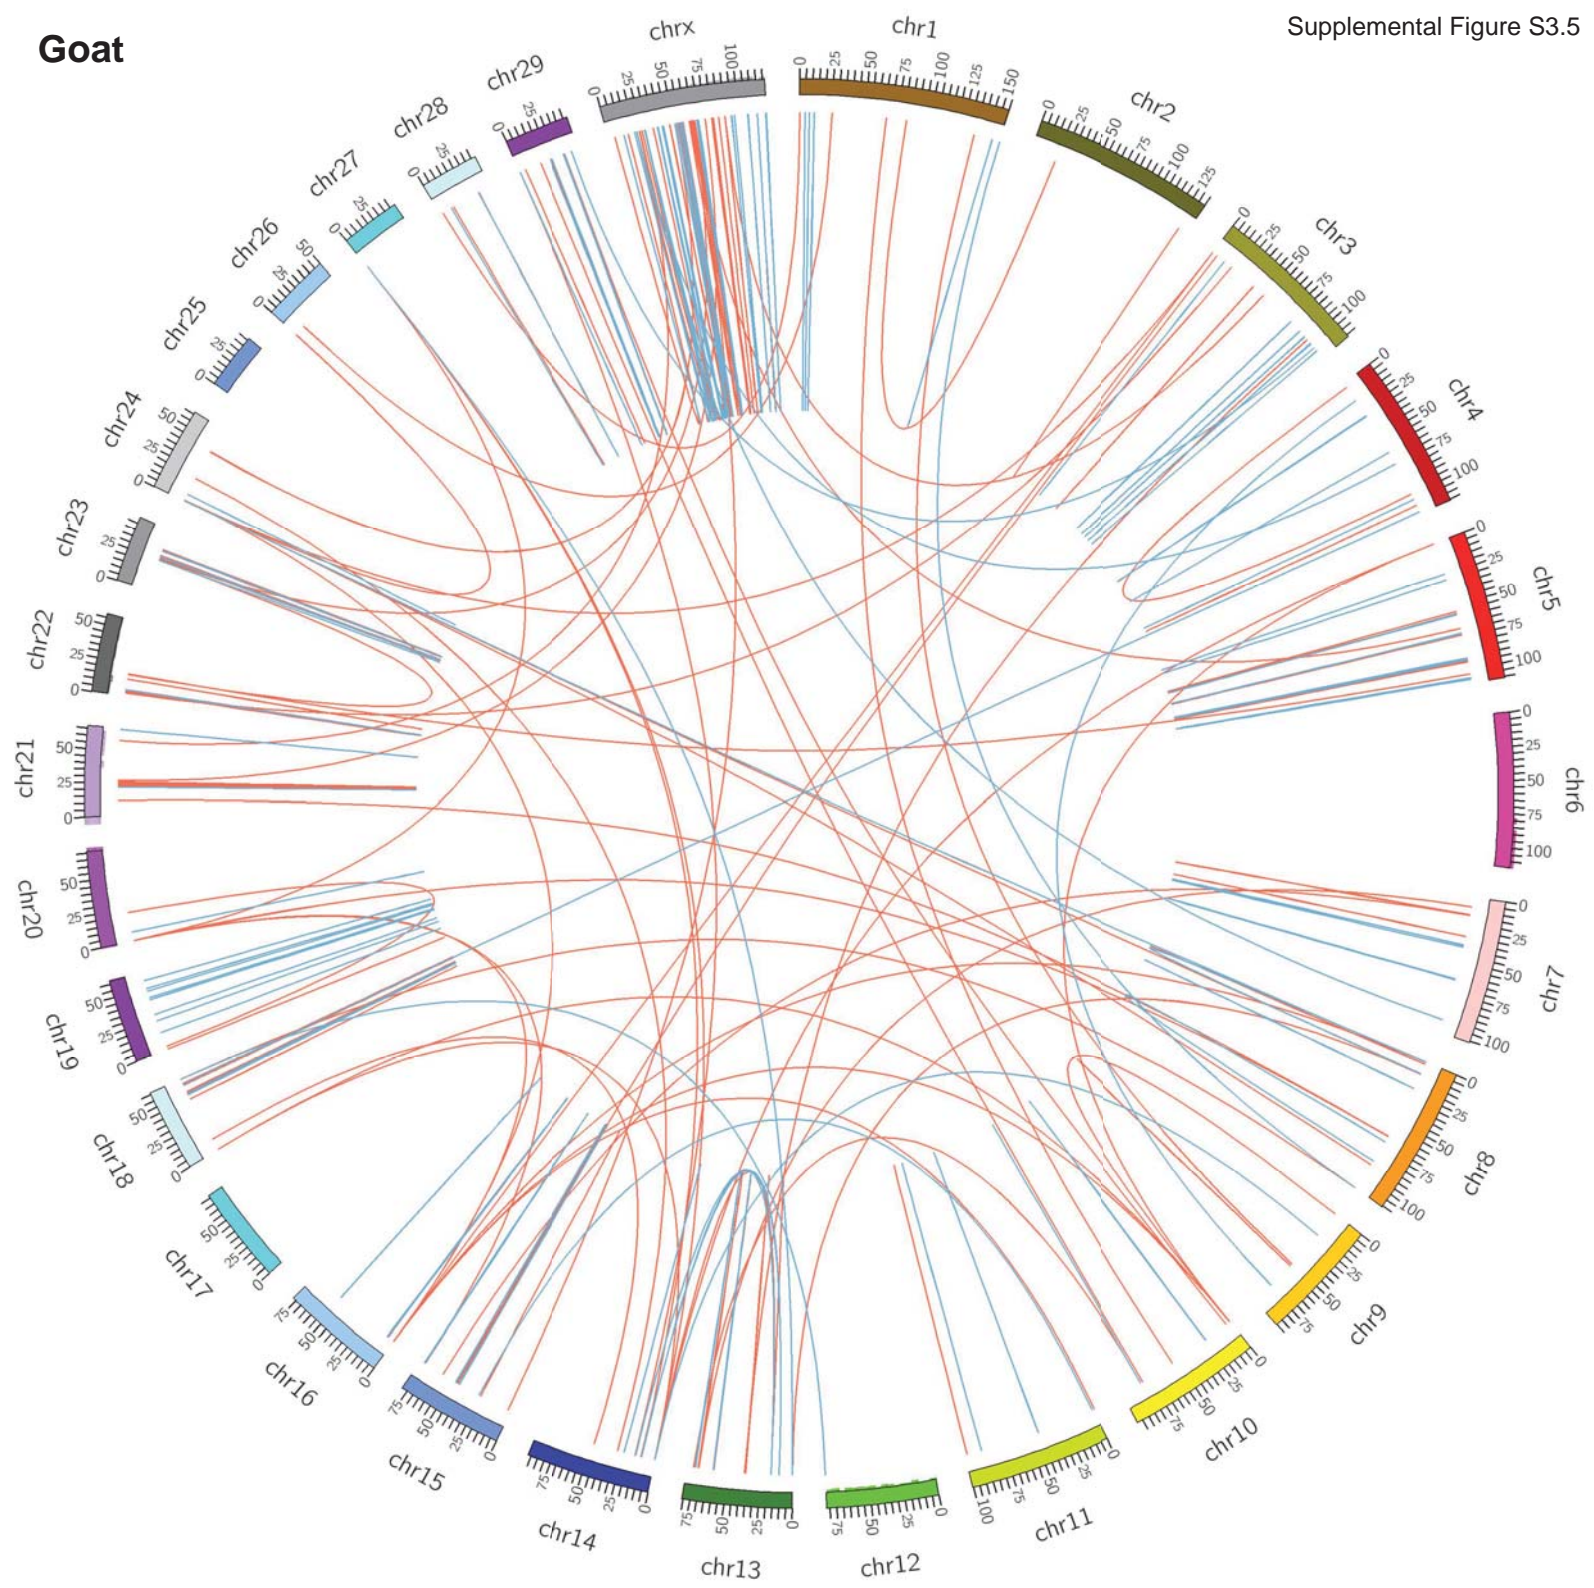



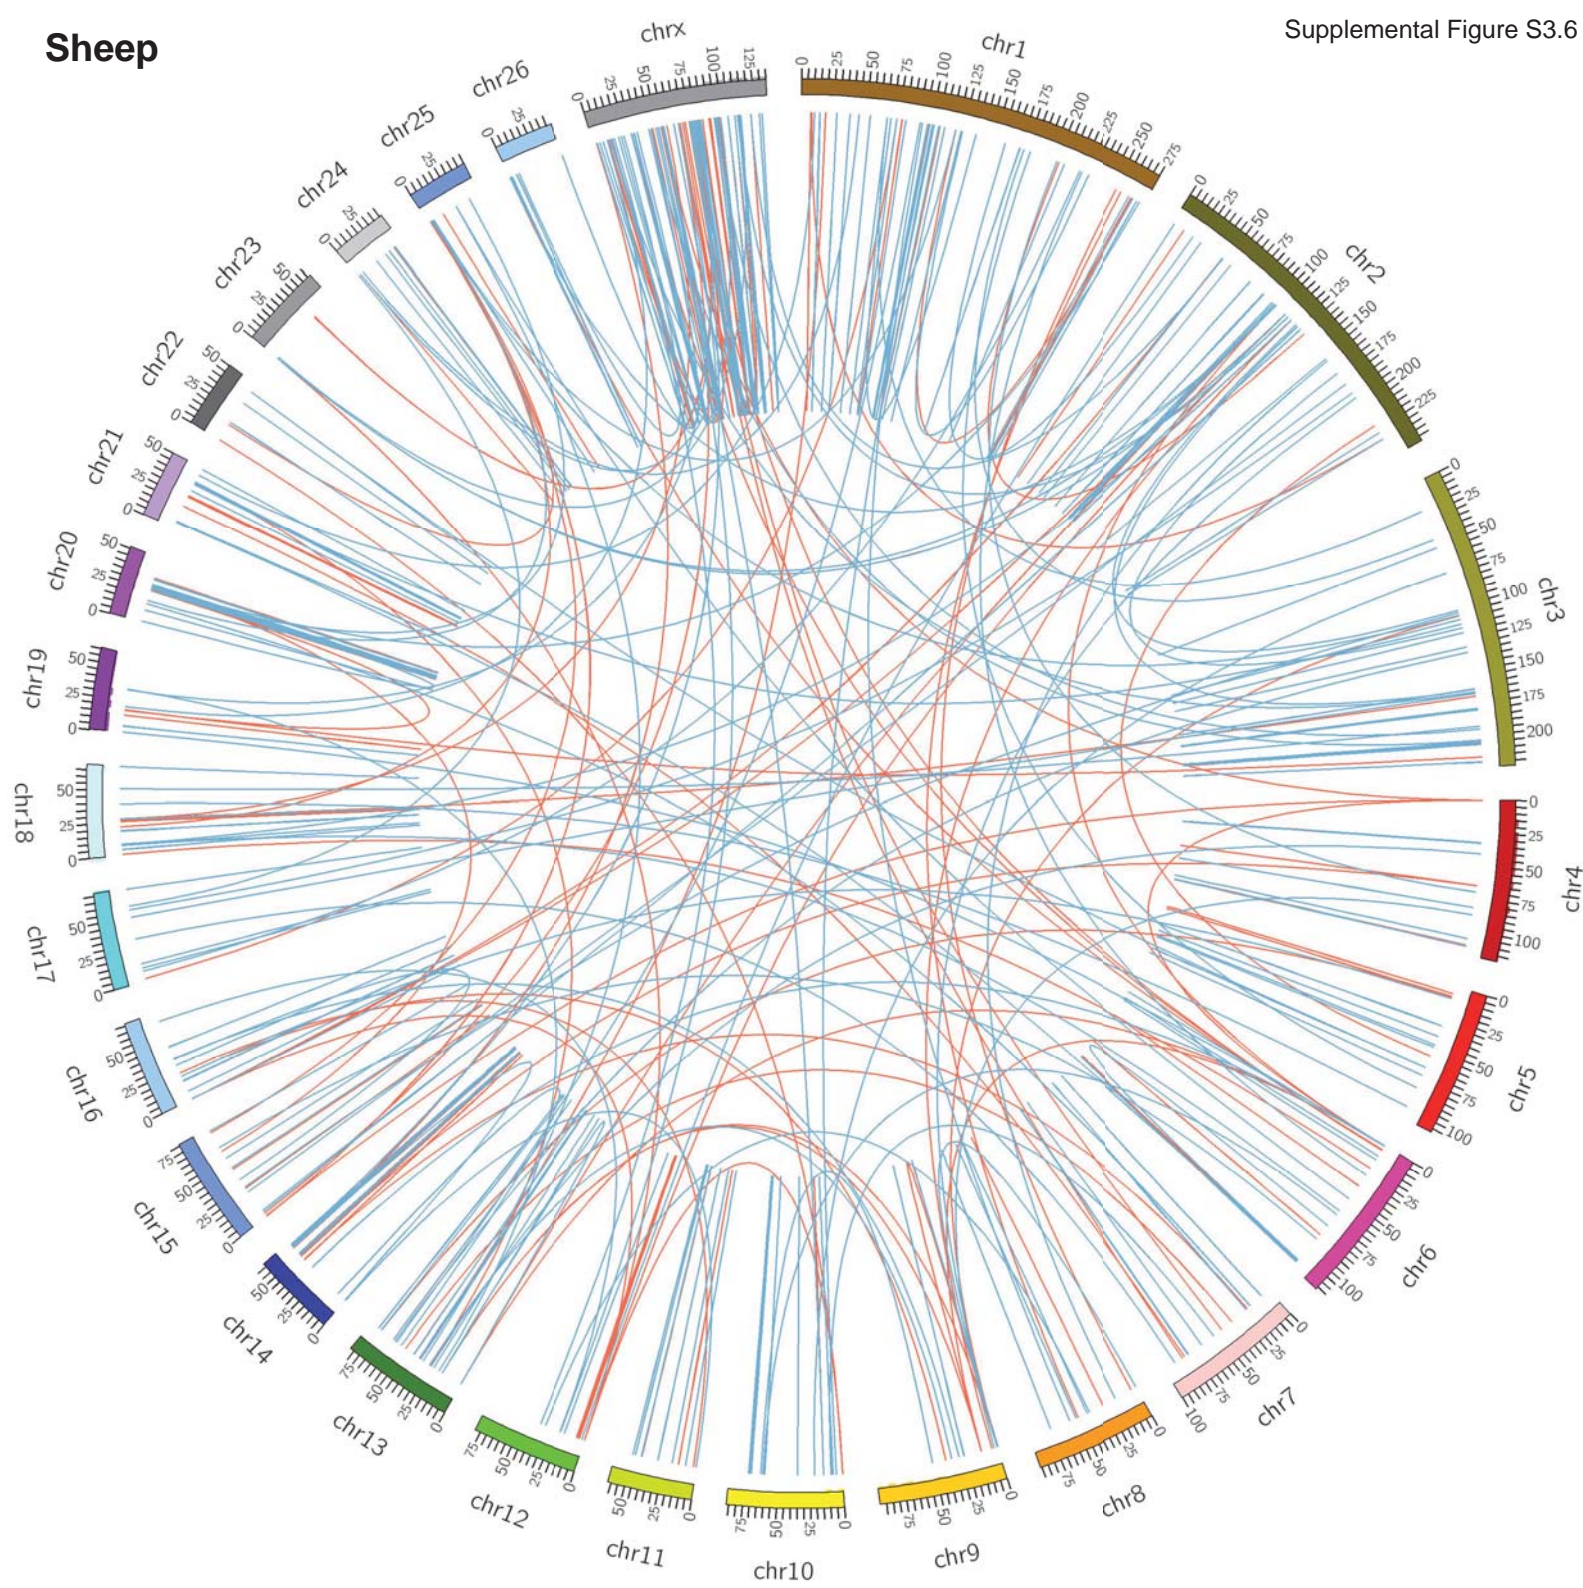



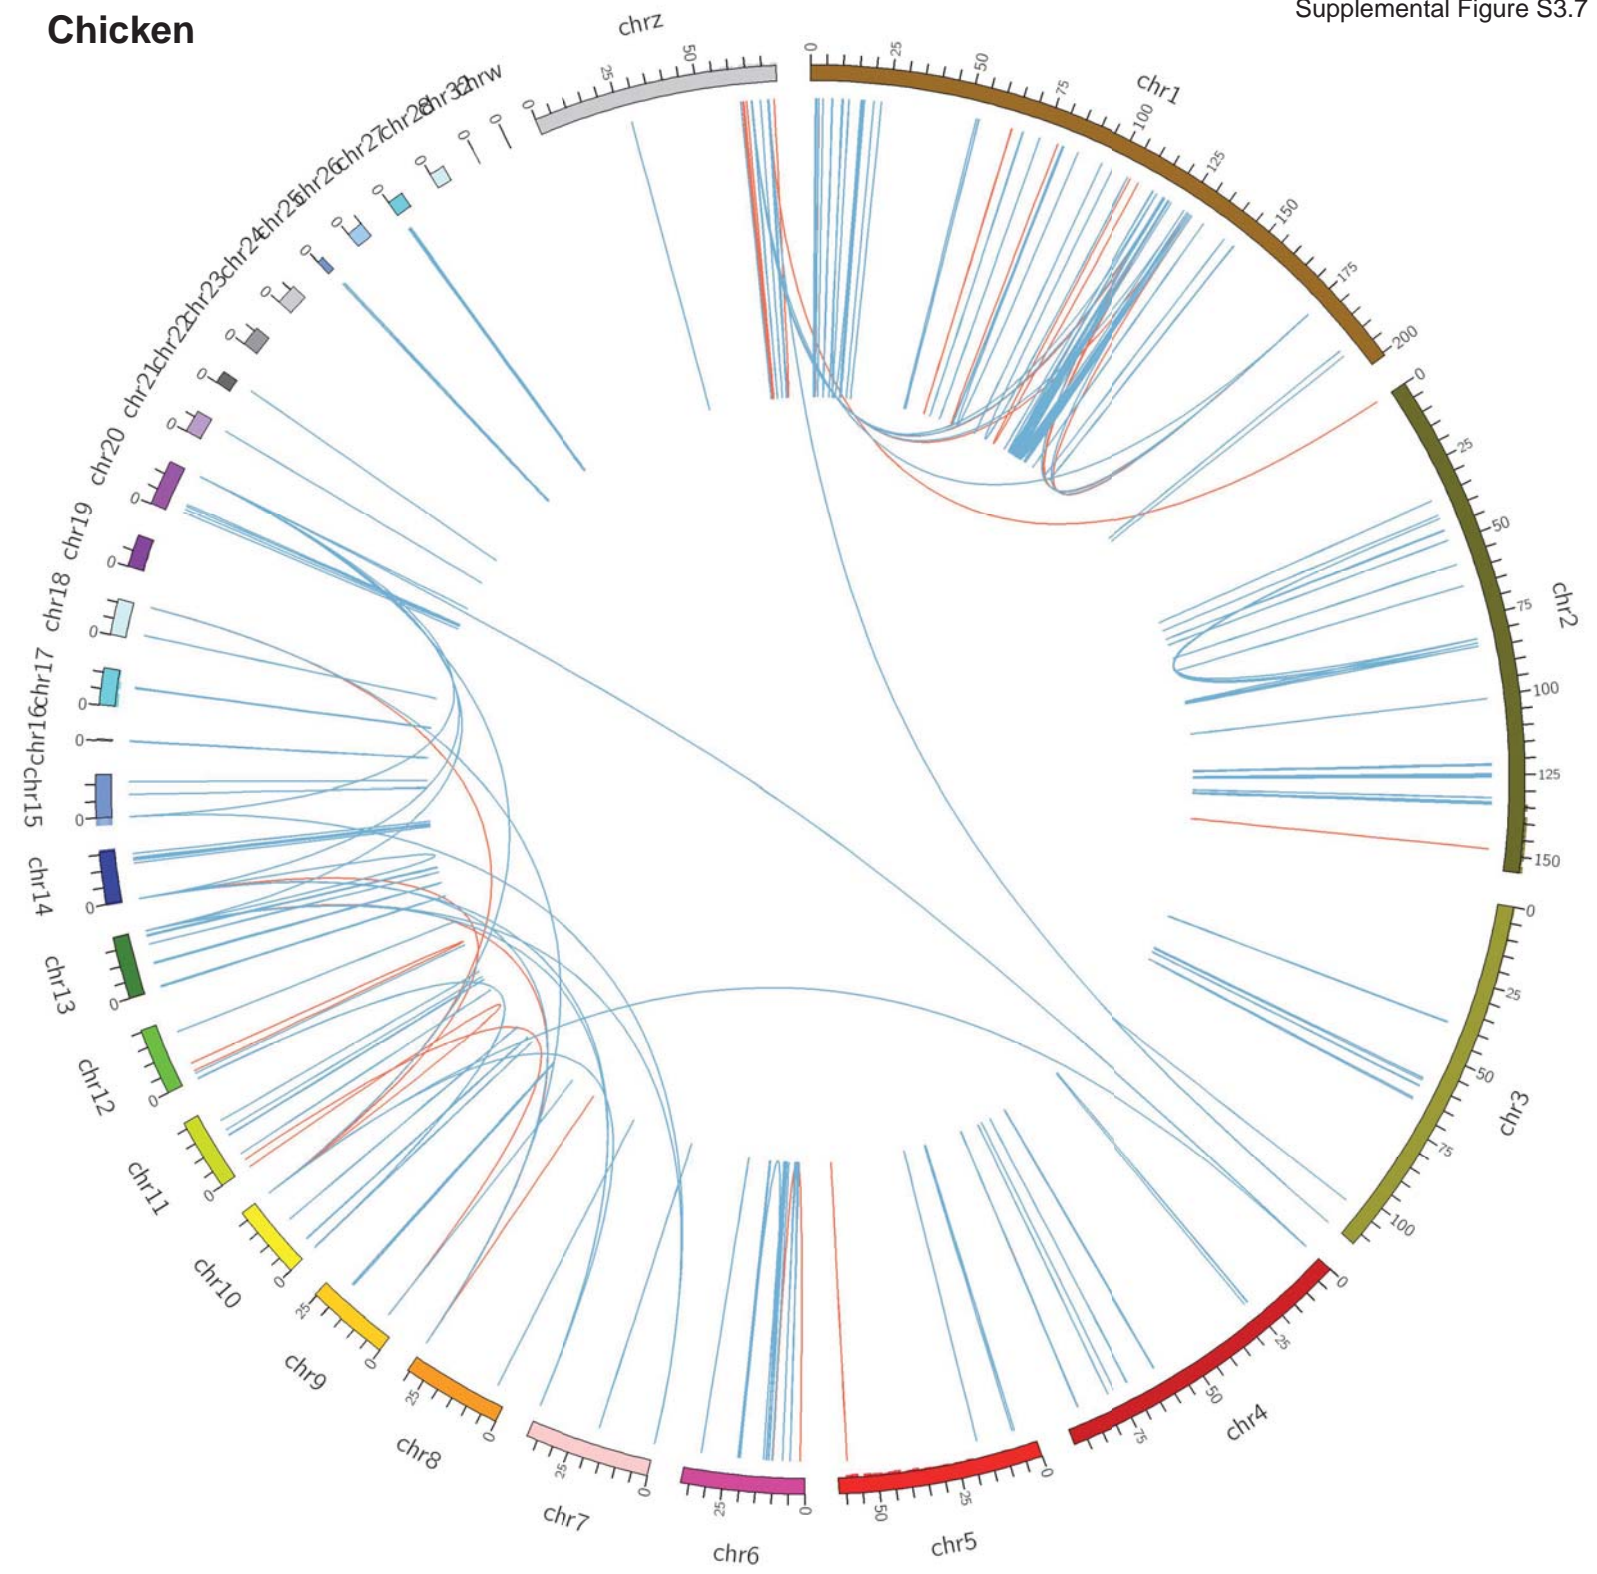

Supplement: 12864_2017_3690_MOESM4_ESM.pdf [file 12864_2017_3690_MOESM4_ESM.pdf]
